# Supplementary material for: The quantum chemical solvation of indole: accounting for strong solute–solvent interactions using implicit/explicit models
Source: Royal Society of Chemistry journal article supplement (doi:10.1039/d1cp05496a), 2022-01-01
Supplement: d1cp05496a1.pdf [file d1cp05496a1.pdf]

**Supplementary Information: The quantum chemical solvation of indole:  
Accounting for strong solute-solvent interactions using implicit/explicit models**

A. Manian,<sup>1, a)</sup> R. A. Shaw,<sup>2</sup> I. Lyskov,<sup>1</sup> and S. P. Russo<sup>1, b)</sup>

<sup>1)</sup>*ARC Centre of Excellence in Exciton Science, School of Science, RMIT University,  
Melbourne, 3000, Australia.*

<sup>2)</sup>*Department of Chemistry, University of Sheffield, Sheffield S3 7HF,  
UK*

(Dated: 2 December 2021)

SI begins with a number of snapshots of the explicit solvent molecules within a PCM described in the discussion, followed by the energetic differences calculated using two different basis sets for the smaller indole-water clusters. The optimised cartesian coordinates for all systems used in this study are then given; at the ground,  $L_a$ , and  $L_b$  excited states.

---

<sup>a)</sup>Electronic mail: [anjay.manian@rmit.edu.au](mailto:anjay.manian@rmit.edu.au)

<sup>b)</sup>Electronic mail: [salvy.russo@rmit.edu.au](mailto:salvy.russo@rmit.edu.au)

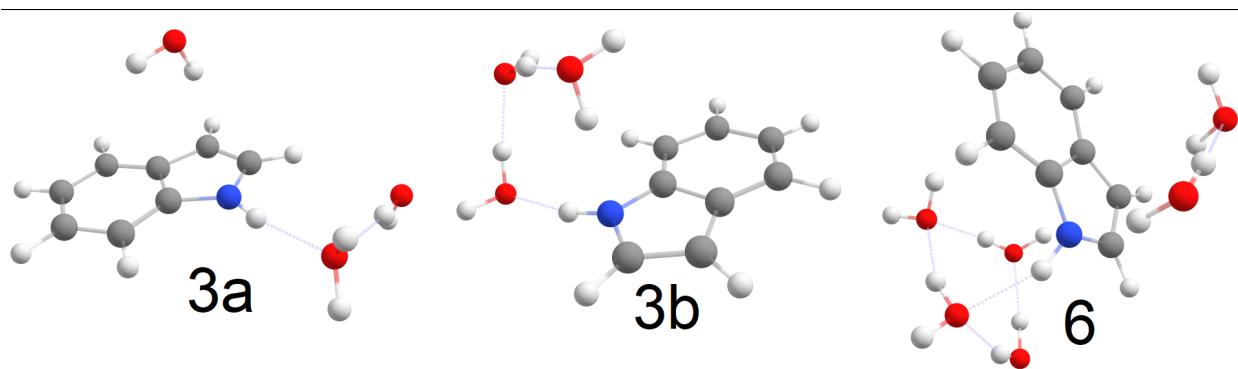

FIG. 1. Solute-solvent organisation upon equilibrium for smaller clusters. Labels indicate the number of solvent molecules.

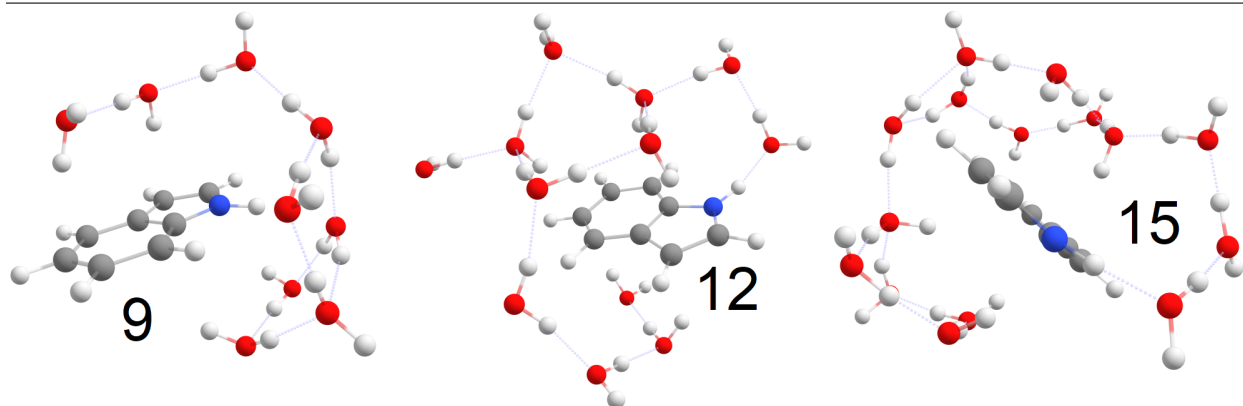

FIG. 2. Solute-solvent organisation upon equilibrium for larger clusters. Labels indicate the number of solvent molecules.

## I. CLUSTER SNAPSHOTS

Following are some snapshots of the studied QC clusters, to illustrate how the solvent couples to the indole chromophore.

## II. SHIFT OF BASIS SET

As per the explicit PCM indole-water clusters, the basis set for the larger clusters was required to be lowered in size, especially in the case of those basis sets with highly diffuse functions. As

TABLE I. Differences in computed absorption, emission, and adiabatic energies as a function of the aVDZ and aVTZ basis sets. Comparison given for explicit PCM indole-water clusters 3a, 3b, and 6 under the B3LYP/aug-cc-pVXZ and CAM-B3LYP/aug-cc-pVXZ method groups. Energies are given in units of eV.

| B3LYP/aug-cc-pVXZ     |            |      |            |          |      |            |           |      |            |
|-----------------------|------------|------|------------|----------|------|------------|-----------|------|------------|
| Cluster               | Absorption |      |            | Emission |      |            | Adiabatic |      |            |
|                       | aVTZ       | aVDZ | $\Delta E$ | aVTZ     | aVDZ | $\Delta E$ | aVTZ      | aVDZ | $\Delta E$ |
| 3a                    | 4.74       | 4.79 | 0.04       | 0.39     | 3.95 | 0.02       | 4.35      | 4.33 | 0.01       |
| 3b                    | 4.79       | 4.81 | 0.02       | 3.92     | 3.92 | 0.01       | 4.39      | 4.35 | 0.05       |
| 6                     | 4.76       | 4.75 | 0.00       | 3.74     | 3.73 | 0.00       | 4.32      | 4.28 | 0.04       |
| CAM-B3LYP/aug-cc-pVXZ |            |      |            |          |      |            |           |      |            |
| 3a                    | 4.74       | 4.80 | 0.05       | 3.97     | 3.99 | 0.01       | 4.33      | 4.33 | 0.00       |
| 3b                    | 4.83       | 4.85 | 0.02       | 3.99     | 4.00 | 0.01       | 4.38      | 4.34 | 0.04       |
| 6                     | 4.83       | 4.83 | 0.00       | 3.81     | 3.81 | 0.01       | 4.31      | 4.27 | 0.04       |

such, to ensure our drawn conclusions are related to cluster size, and not the changing of basis sets, the difference in energies computed using the aVTZ and aVDZ basis sets for the smaller clusters are given in Table I. Here, we see that the deviation between the two basis sets for computed energies for the smaller clusters are at most 0.05 eV, suggesting it's reasonable to use the smaller set for the larger systems.

### III. OPTIMISED GEOMETRIES - IMPLICIT PCM

Following are the optimised geometries using an implicit PCM.

#### A. Water

s0:

|   |            |            |           |
|---|------------|------------|-----------|
| C | 0.4230220  | -1.6786269 | 0.0000000 |
| C | -0.4943510 | -0.6172290 | 0.0000000 |
| C | 0.0000000  | 0.7151769  | 0.0000000 |
| C | 1.3655999  | 1.0018279  | 0.0000000 |
| C | 2.2451968  | -0.0687650 | 0.0000000 |
| C | 1.7785089  | -1.3965369 | 0.0000000 |
| C | -1.9254119 | -0.5273180 | 0.0000000 |
| C | -2.2419288 | 0.8036489  | 0.0000000 |
| N | -1.0889899 | 1.5537319  | 0.0000000 |
| H | 0.0749700  | -2.7046628 | 0.0000000 |
| H | 1.7254689  | 2.0231258  | 0.0000000 |
| H | 3.3114727  | 0.1194270  | 0.0000000 |
| H | 2.4953728  | -2.2081948 | 0.0000000 |
| H | -2.6285778 | -1.3440459 | 0.0000000 |
| H | -3.2052568 | 1.2862879  | 0.0000000 |
| H | -1.0543339 | 2.5588638  | 0.0000000 |

-----  
La:

|   |            |            |            |
|---|------------|------------|------------|
| C | 1.0012209  | -1.4659989 | 0.0000040  |
| C | -0.2391810 | -0.7472719 | 0.0000130  |
| C | -0.2394590 | 0.6568449  | 0.0000080  |
| C | 0.9149959  | 1.4399649  | -0.0000010 |
| C | 2.1613938  | 0.6938089  | -0.0000040 |

|   |            |            |            |
|---|------------|------------|------------|
| C | 2.1908038  | -0.6838759 | -0.0000030 |
| C | -1.5925299 | -1.1594579 | 0.0000140  |
| C | -2.4152328 | 0.0123900  | 0.0000080  |
| N | -1.5874719 | 1.0628989  | 0.0000090  |
| H | 1.0269279  | -2.5464758 | 0.0000050  |
| H | 0.8933989  | 2.5193488  | -0.0000050 |
| H | 3.0931288  | 1.2461159  | -0.0000090 |
| H | 3.1505428  | -1.1872279 | -0.0000070 |
| H | -1.9699828 | -2.1693058 | 0.0000160  |
| H | -3.4856687 | 0.1164500  | 0.0000260  |
| H | -1.8907939 | 2.0260208  | 0.0000100  |

-----

Lb:

|   |            |            |           |
|---|------------|------------|-----------|
| C | 0.4027610  | -1.7223969 | 0.0000000 |
| C | -0.5160050 | -0.6378210 | 0.0000000 |
| C | 0.0000000  | 0.7319859  | 0.0000000 |
| C | 1.3879049  | 1.0459319  | 0.0000000 |
| C | 2.2595798  | -0.0553830 | 0.0000000 |
| C | 1.7769159  | -1.3995199 | 0.0000000 |
| C | -1.9254769 | -0.5364030 | 0.0000000 |
| C | -2.2639328 | 0.8057729  | 0.0000000 |
| N | -1.0706119 | 1.5537849  | 0.0000000 |
| H | 0.0656340  | -2.7483918 | 0.0000000 |
| H | 1.7395199  | 2.0668968  | 0.0000000 |
| H | 3.3292857  | 0.1071570  | 0.0000000 |
| H | 2.5067168  | -2.1995368 | 0.0000000 |
| H | -2.6272398 | -1.3545979 | 0.0000000 |
| H | -3.2200758 | 1.2990269  | 0.0000000 |
| H | -1.0300319 | 2.5599418  | 0.0000000 |

-----

**B. MCH**

s0:

|   |            |            |           |
|---|------------|------------|-----------|
| C | 0.4251930  | -1.6762029 | 0.0000000 |
| C | -0.4927850 | -0.6166920 | 0.0000000 |
| C | 0.0000000  | 0.7144849  | 0.0000000 |
| C | 1.3643219  | 1.0027539  | 0.0000000 |
| C | 2.2447228  | -0.0661040 | 0.0000000 |
| C | 1.7794579  | -1.3931519 | 0.0000000 |
| C | -1.9237639 | -0.5292840 | 0.0000000 |
| C | -2.2441818 | 0.7987269  | 0.0000000 |
| N | -1.0911179 | 1.5522919  | 0.0000000 |
| H | 0.0780750  | -2.7023868 | 0.0000000 |
| H | 1.7247149  | 2.0242358  | 0.0000000 |
| H | 3.3107277  | 0.1230700  | 0.0000000 |
| H | 2.4969588  | -2.2040328 | 0.0000000 |
| H | -2.6247918 | -1.3475379 | 0.0000000 |
| H | -3.2095038 | 1.2772689  | 0.0000000 |
| H | -1.0561519 | 2.5561518  | 0.0000000 |

-----

La:

|   |            |            |            |
|---|------------|------------|------------|
| C | 1.0147249  | 1.4478599  | 0.0000010  |
| C | -0.2279700 | 0.7481569  | -0.0000020 |
| C | -0.2522110 | -0.6491480 | 0.0000000  |
| C | 0.8904889  | -1.4579579 | 0.0000050  |
| C | 2.1401598  | -0.7315039 | 0.0000100  |
| C | 2.1922268  | 0.6452890  | 0.0000090  |
| C | -1.5838569 | 1.1825799  | -0.0000090 |

|   |            |            |            |
|---|------------|------------|------------|
| C | -2.4238708 | 0.0266790  | -0.0000100 |
| N | -1.6097319 | -1.0346809 | -0.0000040 |
| H | 1.0575289  | 2.5270738  | -0.0000010 |
| H | 0.8519549  | -2.5365148 | 0.0000060  |
| H | 3.0642608  | -1.2962859 | 0.0000160  |
| H | 3.1596938  | 1.1323149  | 0.0000140  |
| H | -1.9444039 | 2.1987578  | -0.0000150 |
| H | -3.4957517 | -0.0608170 | -0.0000140 |
| H | -1.9233189 | -1.9934898 | -0.0000020 |

-----  
Lb:

|   |            |            |           |
|---|------------|------------|-----------|
| C | 0.4072390  | -1.7166809 | 0.0000000 |
| C | -0.5098370 | -0.6388340 | 0.0000000 |
| C | 0.0000000  | 0.7299889  | 0.0000000 |
| C | 1.3805149  | 1.0452879  | 0.0000000 |
| C | 2.2607198  | -0.0503170 | 0.0000000 |
| C | 1.7862209  | -1.3977279 | 0.0000000 |
| C | -1.9194659 | -0.5416950 | 0.0000000 |
| C | -2.2628578 | 0.8016699  | 0.0000000 |
| N | -1.0866469 | 1.5543899  | 0.0000000 |
| H | 0.0699560  | -2.7428028 | 0.0000000 |
| H | 1.7342539  | 2.0660938  | 0.0000000 |
| H | 3.3284047  | 0.1228730  | 0.0000000 |
| H | 2.5154278  | -2.1971418 | 0.0000000 |
| H | -2.6203738 | -1.3604139 | 0.0000000 |
| H | -3.2259248 | 1.2814799  | 0.0000000 |
| H | -1.0504219 | 2.5590338  | 0.0000000 |

-----

#### IV. OPTIMISED GEOMETRIES - IMPLICIT PISALR

Following are the optimised geometries using an implicit PISALR method.

##### A. Water

s0:

|   |            |            |           |
|---|------------|------------|-----------|
| C | 0.4230220  | -1.6786269 | 0.0000000 |
| C | -0.4943510 | -0.6172290 | 0.0000000 |
| C | 0.0000000  | 0.7151769  | 0.0000000 |
| C | 1.3655999  | 1.0018279  | 0.0000000 |
| C | 2.2451968  | -0.0687650 | 0.0000000 |
| C | 1.7785089  | -1.3965369 | 0.0000000 |
| C | -1.9254119 | -0.5273180 | 0.0000000 |
| C | -2.2419288 | 0.8036489  | 0.0000000 |
| N | -1.0889899 | 1.5537319  | 0.0000000 |
| H | 0.0749700  | -2.7046628 | 0.0000000 |
| H | 1.7254689  | 2.0231258  | 0.0000000 |
| H | 3.3114727  | 0.1194270  | 0.0000000 |
| H | 2.4953728  | -2.2081948 | 0.0000000 |
| H | -2.6285778 | -1.3440459 | 0.0000000 |
| H | -3.2052568 | 1.2862879  | 0.0000000 |
| H | -1.0543339 | 2.5588638  | 0.0000000 |

-----  
La:

|   |            |            |            |
|---|------------|------------|------------|
| C | 1.0012209  | -1.4659989 | 0.0000040  |
| C | -0.2391810 | -0.7472719 | 0.0000130  |
| C | -0.2394590 | 0.6568449  | 0.0000080  |
| C | 0.9149959  | 1.4399649  | -0.0000010 |
| C | 2.1613938  | 0.6938089  | -0.0000040 |



|   |            |            |            |
|---|------------|------------|------------|
| C | 2.1908038  | -0.6838759 | -0.0000030 |
| C | -1.5925299 | -1.1594579 | 0.0000140  |
| C | -2.4152328 | 0.0123900  | 0.0000080  |
| N | -1.5874719 | 1.0628989  | 0.0000090  |
| H | 1.0269279  | -2.5464758 | 0.0000050  |
| H | 0.8933989  | 2.5193488  | -0.0000050 |
| H | 3.0931288  | 1.2461159  | -0.0000090 |
| H | 3.1505428  | -1.1872279 | -0.0000070 |
| H | -1.9699828 | -2.1693058 | 0.0000160  |
| H | -3.4856687 | 0.1164500  | 0.0000260  |
| H | -1.8907939 | 2.0260208  | 0.0000100  |

-----

Lb:

|   |            |            |            |
|---|------------|------------|------------|
| C | 0.9834859  | -1.4746889 | -0.0000010 |
| C | -0.2560620 | -0.7790039 | -0.0000010 |
| C | -0.2504390 | 0.6846879  | -0.0000010 |
| C | 0.9405069  | 1.4634619  | 0.0000000  |
| C | 2.1418018  | 0.7356839  | 0.0000000  |
| C | 2.1585018  | -0.6924079 | 0.0000000  |
| C | -1.6123439 | -1.1756979 | 0.0000000  |
| C | -2.3978338 | -0.0359340 | 0.0000000  |
| N | -1.5404489 | 1.0813949  | 0.0000000  |
| H | 1.0257329  | -2.5538308 | 0.0000000  |
| H | 0.9130209  | 2.5430118  | 0.0000000  |
| H | 3.0877048  | 1.2610509  | 0.0000010  |
| H | 3.1216408  | -1.1873539 | 0.0000010  |
| H | -1.9845598 | -2.1873118 | 0.0000000  |
| H | -3.4660017 | 0.0926750  | 0.0000020  |
| H | -1.8526359 | 2.0385648  | 0.0000000  |

-----

**B. MCH**

s0:

|   |            |            |           |
|---|------------|------------|-----------|
| C | 0.4251930  | -1.6762029 | 0.0000000 |
| C | -0.4927850 | -0.6166920 | 0.0000000 |
| C | 0.0000000  | 0.7144849  | 0.0000000 |
| C | 1.3643219  | 1.0027539  | 0.0000000 |
| C | 2.2447228  | -0.0661040 | 0.0000000 |
| C | 1.7794579  | -1.3931519 | 0.0000000 |
| C | -1.9237639 | -0.5292840 | 0.0000000 |
| C | -2.2441818 | 0.7987269  | 0.0000000 |
| N | -1.0911179 | 1.5522919  | 0.0000000 |
| H | 0.0780750  | -2.7023868 | 0.0000000 |
| H | 1.7247149  | 2.0242358  | 0.0000000 |
| H | 3.3107277  | 0.1230700  | 0.0000000 |
| H | 2.4969588  | -2.2040328 | 0.0000000 |
| H | -2.6247918 | -1.3475379 | 0.0000000 |
| H | -3.2095038 | 1.2772689  | 0.0000000 |
| H | -1.0561519 | 2.5561518  | 0.0000000 |

-----

La:

|   |            |            |            |
|---|------------|------------|------------|
| C | 1.0147249  | 1.4478599  | 0.0000010  |
| C | -0.2279700 | 0.7481569  | -0.0000020 |
| C | -0.2522110 | -0.6491480 | 0.0000000  |
| C | 0.8904889  | -1.4579579 | 0.0000050  |
| C | 2.1401598  | -0.7315039 | 0.0000100  |
| C | 2.1922268  | 0.6452890  | 0.0000090  |
| C | -1.5838569 | 1.1825799  | -0.0000090 |

|   |            |            |            |
|---|------------|------------|------------|
| C | -2.4238708 | 0.0266790  | -0.0000100 |
| N | -1.6097319 | -1.0346809 | -0.0000040 |
| H | 1.0575289  | 2.5270738  | -0.0000020 |
| H | 0.8519549  | -2.5365148 | 0.0000060  |
| H | 3.0642608  | -1.2962859 | 0.0000160  |
| H | 3.1596938  | 1.1323149  | 0.0000130  |
| H | -1.9444039 | 2.1987578  | -0.0000130 |
| H | -3.4957517 | -0.0608170 | -0.0000140 |
| H | -1.9233199 | -1.9934898 | -0.0000030 |

-----  
Lb:

|   |            |            |           |
|---|------------|------------|-----------|
| C | 0.4072390  | -1.7166809 | 0.0000000 |
| C | -0.5098370 | -0.6388340 | 0.0000000 |
| C | 0.0000000  | 0.7299889  | 0.0000000 |
| C | 1.3805149  | 1.0452879  | 0.0000000 |
| C | 2.2607198  | -0.0503170 | 0.0000000 |
| C | 1.7862209  | -1.3977279 | 0.0000000 |
| C | -1.9194659 | -0.5416950 | 0.0000000 |
| C | -2.2628578 | 0.8016699  | 0.0000000 |
| N | -1.0866469 | 1.5543899  | 0.0000000 |
| H | 0.0699560  | -2.7428028 | 0.0000000 |
| H | 1.7342539  | 2.0660938  | 0.0000000 |
| H | 3.3284047  | 0.1228730  | 0.0000000 |
| H | 2.5154278  | -2.1971418 | 0.0000000 |
| H | -2.6203738 | -1.3604139 | 0.0000000 |
| H | -3.2259248 | 1.2814799  | 0.0000000 |
| H | -1.0504219 | 2.5590338  | 0.0000000 |

-----

## V. OPTIMISED GEOMETRIES - EXPLICIT PCM

Following are the optimised geometries using an explicit PCM. Clusters are labelled according to the number of solvent molecules part of the complex.

### A. Water Cluster - Size 3a - B3LYP/def2TZVP Method Group

s0:

|   |            |            |            |
|---|------------|------------|------------|
| C | -2.6665508 | 0.6184150  | -0.7238899 |
| C | -1.2675889 | 0.6461000  | -0.6399420 |
| C | -0.5820700 | -0.5147170 | -0.1867510 |
| C | -1.2579849 | -1.6792969 | 0.1775500  |
| C | -2.6397178 | -1.6749859 | 0.0826100  |
| C | -3.3373817 | -0.5374490 | -0.3643090 |
| C | -0.2643970 | 1.6405979  | -0.8960379 |
| C | 0.9488959  | 1.0658489  | -0.6074810 |
| N | 0.7610519  | -0.2265690 | -0.1860130 |
| H | -3.2129488 | 1.4899579  | -1.0623369 |
| H | -0.7213609 | -2.5531508 | 0.5237130  |
| H | -3.1941418 | -2.5626708 | 0.3584220  |
| H | -4.4176257 | -0.5710310 | -0.4245290 |
| H | -0.4206670 | 2.6421508  | -1.2612149 |
| H | 1.9454809  | 1.4717499  | -0.6659569 |
| H | 1.5066309  | -0.8466799 | 0.1119490  |
| O | 3.1729188  | -1.7155909 | 0.5904600  |
| H | 3.3661037  | -2.5634328 | 0.1709000  |
| H | 3.3216957  | -1.8509229 | 1.5348569  |
| O | -0.5939420 | 1.8946419  | 2.3548038  |
| H | -1.2369489 | 1.1761369  | 2.3546498  |
| H | -0.3411560 | 1.9762318  | 1.4221099  |
| O | 4.4376557  | 0.5864260  | -0.5832400 |

|   |           |            |            |
|---|-----------|------------|------------|
| H | 4.0727137 | -0.2207700 | -0.1797880 |
| H | 4.2725727 | 0.4875290  | -1.5273819 |

-----

La:

|   |            |            |            |
|---|------------|------------|------------|
| C | 2.4431868  | -1.1419099 | -0.4474310 |
| C | 1.0241349  | -1.0257739 | -0.3287910 |
| C | 0.4106840  | 0.2291810  | -0.3593630 |
| C | 1.1114929  | 1.4381859  | -0.4822320 |
| C | 2.5168208  | 1.2839449  | -0.7938189 |
| C | 3.1456918  | 0.0600760  | -0.7665839 |
| C | -0.0051590 | -1.9793238 | -0.0953550 |
| C | -1.2420079 | -1.2696689 | 0.0088150  |
| N | -0.9688809 | 0.0225260  | -0.1552350 |
| H | 2.9286838  | -2.1068548 | -0.4627720 |
| H | 0.6146790  | 2.3941738  | -0.5459050 |
| H | 3.0923798  | 2.1707648  | -1.0280659 |
| H | 4.2078967  | 0.0104270  | -0.9716159 |
| H | 0.1015910  | -3.0470658 | 0.0016870  |
| H | -2.2491498 | -1.6179549 | 0.1670370  |
| H | -1.6785089 | 0.7582919  | -0.1316490 |
| O | -3.2417638 | 1.7831379  | -0.0465730 |
| H | -3.4488797 | 2.3069008  | -0.8310049 |
| H | -3.3162047 | 2.3890348  | 0.7018079  |
| O | 2.1427218  | 0.4047070  | 2.4427938  |
| H | 2.4519648  | -0.3010840 | 1.8489419  |
| H | 1.7303709  | 1.0282449  | 1.8207609  |
| O | -4.5372147 | -0.7861919 | 0.1917470  |
| H | -4.2139287 | 0.1272350  | 0.1052510  |
| H | -4.7777436 | -1.0512899 | -0.7030119 |

-----  
**B. Water Cluster - Size 3b - B3LYP/def2TZVP Method Group**

s0:

|   |            |            |            |
|---|------------|------------|------------|
| C | -2.8934918 | -0.1484600 | 0.2685780  |
| C | -1.7778319 | 0.6782219  | 0.0756340  |
| C | -0.5803390 | 0.1062720  | -0.4316300 |
| C | -0.4768840 | -1.2486689 | -0.7437969 |
| C | -1.5976229 | -2.0383188 | -0.5452460 |
| C | -2.7939898 | -1.4934159 | -0.0437440 |
| C | -1.5119439 | 2.0729478  | 0.2826230  |
| C | -0.2132180 | 2.2923658  | -0.0885850 |
| N | 0.3633200  | 1.1086399  | -0.5012020 |
| H | -3.8187677 | 0.2597420  | 0.6559189  |
| H | 0.4468470  | -1.6667659 | -1.1218169 |
| H | -1.5524809 | -3.0941418 | -0.7789819 |
| H | -3.6491257 | -2.1414298 | 0.0998210  |
| H | -2.1959908 | 2.8137528  | 0.6621929  |
| H | 0.3621730  | 3.2031228  | -0.0855470 |
| H | 1.2912879  | 1.0064739  | -0.9194379 |
| O | 2.9478348  | 0.4405550  | -1.5434439 |
| H | 3.6449907  | 1.1056539  | -1.5544059 |
| H | 3.1991648  | -0.2027730 | -0.8418849 |
| O | 1.5362179  | -0.0266190 | 2.1547398  |
| H | 1.0785359  | 0.4787390  | 1.4646909  |
| H | 0.8541629  | -0.5816490 | 2.5520418  |
| O | 3.3929327  | -1.3027139 | 0.5393910  |
| H | 3.1105138  | -2.2028668 | 0.3410610  |
| H | 2.7414888  | -0.9537859 | 1.1862609  |

-----  
La:

|   |            |            |            |
|---|------------|------------|------------|
| C | -2.9033388 | -0.1548420 | 0.3724430  |
| C | -1.7803369 | 0.7186099  | 0.2837440  |
| C | -0.6193400 | 0.3233710  | -0.3809980 |
| C | -0.4330100 | -0.9487159 | -0.9558909 |
| C | -1.6299759 | -1.7745619 | -0.9566239 |
| C | -2.7845228 | -1.3981439 | -0.3078490 |
| C | -1.5371639 | 2.0326798  | 0.7788459  |
| C | -0.2076590 | 2.3983028  | 0.4018220  |
| N | 0.3085750  | 1.3827729  | -0.2808680 |
| H | -3.8115027 | 0.1391590  | 0.8775079  |
| H | 0.3904490  | -1.1538659 | -1.6266539 |
| H | -1.5945289 | -2.7300528 | -1.4647539 |
| H | -3.6313787 | -2.0740028 | -0.3168110 |
| H | -2.2139828 | 2.6587858  | 1.3363979  |
| H | 0.3390560  | 3.3052137  | 0.5919600  |
| H | 1.2781589  | 1.3435579  | -0.6437010 |
| O | 2.9286218  | 1.0791649  | -1.1457919 |
| H | 3.5116987  | 1.8389079  | -1.0379819 |
| H | 3.2741787  | 0.3781430  | -0.5400830 |
| O | 1.2788439  | -1.9951168 | 1.2691749  |
| H | 0.8898109  | -1.6590999 | 2.0863828  |
| H | 0.6650049  | -1.7007659 | 0.5466940  |
| O | 3.6756857  | -0.8744809 | 0.5842140  |
| H | 4.2152737  | -1.5797499 | 0.2095190  |
| H | 2.8346078  | -1.3023719 | 0.8738609  |

-----

### C. Water Cluster - Size 6 - B3LYP/def2TZVP Method Group

s0:

|   |            |            |            |
|---|------------|------------|------------|
| C | 1.7870229  | -1.6373679 | 1.1804769  |
| C | 1.0508339  | -0.4689880 | 0.9415029  |
| C | 0.4811620  | -0.2631090 | -0.3418780 |
| C | 0.6231410  | -1.1892889 | -1.3755019 |
| C | 1.3425209  | -2.3450228 | -1.1038269 |
| C | 1.9195799  | -2.5649438 | 0.1603570  |
| C | 0.6916399  | 0.6763159  | 1.7389559  |
| C | -0.0641510 | 1.4978189  | 0.9411799  |
| N | -0.1710650 | 0.9561599  | -0.3219540 |
| H | 2.2376228  | -1.8137529 | 2.1491578  |
| H | 0.2004210  | -1.0061209 | -2.3551148 |
| H | 1.4701529  | -3.0858228 | -1.8824959 |
| H | 2.4789198  | -3.4753367 | 0.3332840  |
| H | 0.9511989  | 0.8575159  | 2.7696398  |
| H | -0.5494240 | 2.4305738  | 1.1738319  |
| H | -0.9083429 | 1.1934829  | -0.9827329 |
| O | -2.6287098 | 0.6733359  | -1.7826489 |
| H | -2.6578018 | -0.2765040 | -1.5503369 |
| H | -2.9330478 | 0.7461349  | -2.6940728 |
| O | 3.5964827  | 1.6222259  | 0.5454380  |
| H | 4.0627277  | 0.7847319  | 0.4336750  |
| H | 2.8225568  | 1.3996389  | 1.0854649  |
| O | -3.6753917 | 1.7421459  | 0.6843539  |
| H | -3.4351677 | 1.5233739  | -0.2312480 |
| H | -3.3016627 | 1.0006909  | 1.1967949  |
| O | 2.2531038  | 2.4680648  | -1.8046939 |
| H | 1.3758539  | 2.1336198  | -1.5796309 |
| H | 2.7998088  | 2.2015398  | -1.0411189 |



|   |            |            |            |
|---|------------|------------|------------|
| O | -2.4512088 | -0.5512120 | 1.8823999  |
| H | -1.5391439 | -0.2725510 | 2.0491348  |
| H | -2.4037248 | -1.1043179 | 1.0799829  |
| O | -2.3550138 | -1.8743219 | -0.6391070 |
| H | -1.4513469 | -2.1687478 | -0.8335239 |
| H | -2.9267428 | -2.6356638 | -0.8005459 |

-----

La:

|   |            |            |            |
|---|------------|------------|------------|
| C | -1.8780469 | -0.3915360 | 1.6461019  |
| C | -0.8722239 | -0.7997729 | 0.7208299  |
| C | -0.3114920 | 0.1038550  | -0.1748130 |
| C | -0.6485600 | 1.4726839  | -0.2331880 |
| C | -1.6520779 | 1.8743649  | 0.7272129  |
| C | -2.2165898 | 0.9959099  | 1.6230689  |
| C | -0.2898310 | -2.0745168 | 0.4346140  |
| C | 0.6471680  | -1.8908399 | -0.6260990 |
| N | 0.6159670  | -0.6107090 | -0.9693479 |
| H | -2.2293898 | -1.0534769 | 2.4244548  |
| H | -0.3355280 | 2.1181628  | -1.0416289 |
| H | -1.9626959 | 2.9112958  | 0.7388409  |
| H | -2.9519018 | 1.3675839  | 2.3253228  |
| H | -0.5087840 | -3.0159588 | 0.9096919  |
| H | 1.3296969  | -2.5909878 | -1.0731099 |
| H | 1.2900929  | -0.1613660 | -1.5949129 |
| O | 2.8878788  | 0.8290939  | -1.7966029 |
| H | 2.7957678  | 1.4617779  | -1.0543589 |
| H | 3.1609298  | 1.3360039  | -2.5692468 |
| O | -4.0987697 | -1.1170049 | -0.3537020 |
| H | -3.4661517 | -0.9390899 | 0.3770160  |
| H | -3.9789607 | -2.0516528 | -0.5615490 |

|   |            |            |            |
|---|------------|------------|------------|
| O | 4.0039667  | -1.4171359 | -0.3054210 |
| H | 3.7879037  | -0.7117989 | -0.9358599 |
| H | 3.5186837  | -1.1634459 | 0.5014720  |
| O | -3.0049998 | 0.6074030  | -2.3160628 |
| H | -2.2728908 | 0.9996579  | -1.8176619 |
| H | -3.4161677 | -0.0116410 | -1.6812179 |
| O | 2.5803318  | -0.3499930 | 1.9427259  |
| H | 1.6981589  | -0.6776119 | 2.1534348  |
| H | 2.4425308  | 0.5490000  | 1.5838249  |
| O | 2.1872678  | 2.0847128  | 0.5806010  |
| H | 1.2112329  | 2.1296798  | 0.4500580  |
| H | 2.4602308  | 2.9413308  | 0.9321809  |

-----

#### D. Water Cluster - Size 9 - B3LYP/def2TZVP Method Group

s0:

|   |            |            |            |
|---|------------|------------|------------|
| C | -2.6751828 | -2.0458288 | -0.0876390 |
| C | -1.7335569 | -1.2864969 | -0.7953579 |
| C | -0.6363160 | -0.7151699 | -0.0887940 |
| C | -0.4641200 | -0.8907219 | 1.2856829  |
| C | -1.4052629 | -1.6597869 | 1.9542119  |
| C | -2.5007548 | -2.2316148 | 1.2760579  |
| C | -1.5947629 | -0.8847089 | -2.1666308 |
| C | -0.4523120 | -0.1265570 | -2.2440578 |
| N | 0.1160190  | -0.0115850 | -0.9981149 |
| H | -3.5241327 | -2.4828358 | -0.5983200 |
| H | 0.3520270  | -0.4168400 | 1.8145719  |
| H | -1.3028809 | -1.8154809 | 3.0203958  |
| H | -3.2152738 | -2.8251128 | 1.8319959  |

|   |            |            |            |
|---|------------|------------|------------|
| H | -2.2424568 | -1.1432049 | -2.9881358 |
| H | 0.0028750  | 0.3520310  | -3.0954688 |
| H | 1.0203649  | 0.4153320  | -0.8186819 |
| O | 3.0001108  | 0.7620509  | -0.9372089 |
| H | 3.3093847  | 0.3528070  | -0.1037400 |
| H | 3.0092018  | 0.0269870  | -1.5866269 |
| O | -2.7809838 | 1.9440679  | -1.0128019 |
| H | -3.0573008 | 1.5796949  | -0.1437660 |
| H | -2.5070268 | 1.1737079  | -1.5339279 |
| O | 2.7895228  | -1.6576599 | -2.2905568 |
| H | 2.0276188  | -1.7433999 | -2.8751908 |
| H | 2.5270018  | -2.1014168 | -1.4512359 |
| O | -0.6569759 | 3.6371897  | -0.8332959 |
| H | -1.0125559 | 4.4947677  | -0.5760840 |
| H | -1.4294389 | 3.0229308  | -0.8736729 |
| O | 2.2039538  | -2.6249968 | 0.2298140  |
| H | 1.2610859  | -2.6006078 | 0.4387140  |
| H | 2.6037408  | -1.9280359 | 0.7930079  |
| O | 3.3748207  | -0.4729950 | 1.5405299  |
| H | 2.8275528  | 0.1824190  | 2.0480398  |
| H | 4.2097237  | -0.5712930 | 2.0120668  |
| O | -3.5337187 | 0.9207249  | 1.4531559  |
| H | -3.0393478 | 1.3230919  | 2.1774958  |
| H | -3.2978717 | -0.0199020 | 1.4853269  |
| O | 1.6943699  | 2.9035558  | 0.3431610  |
| H | 0.8340679  | 3.1502228  | -0.0676840 |
| H | 2.1500708  | 2.3254568  | -0.2943900 |
| O | 1.7525409  | 1.3926909  | 2.5634578  |
| H | 1.6735959  | 2.0218468  | 1.7987559  |
| H | 2.0323118  | 1.9162189  | 3.3224807  |

-----  
La:

|   |            |            |            |
|---|------------|------------|------------|
| C | -2.6685978 | -2.0380308 | 0.3183910  |
| C | -1.5994789 | -1.6716129 | -0.5523560 |
| C | -0.4490750 | -1.0644819 | -0.0578250 |
| C | -0.1876130 | -0.8570589 | 1.3119169  |
| C | -1.2713219 | -1.2634929 | 2.1843538  |
| C | -2.4376378 | -1.8274209 | 1.7092489  |
| C | -1.4606989 | -1.7226169 | -1.9769358 |
| C | -0.1996370 | -1.1422999 | -2.3050268 |
| N | 0.3751220  | -0.7624199 | -1.1696109 |
| H | -3.5501847 | -2.5453348 | -0.0460430 |
| H | 0.5612580  | -0.1588600 | 1.6524079  |
| H | -1.1445389 | -1.1415779 | 3.2542428  |
| H | -3.2027618 | -2.1202948 | 2.4183098  |
| H | -2.1709088 | -2.1060668 | -2.6905928 |
| H | 0.2548330  | -0.9775099 | -3.2661128 |
| H | 1.2793909  | -0.2660200 | -1.1139719 |
| O | 2.7958258  | 0.6697449  | -1.1464719 |
| H | 2.9527948  | 0.9438369  | -0.2185110 |
| H | 3.3625977  | -0.1247290 | -1.2685509 |
| O | -3.3579547 | 1.0416099  | -0.2896850 |
| H | -2.9102218 | 1.4074009  | 0.5077230  |
| H | -3.3485487 | 0.0768940  | -0.1464080 |
| O | 4.0596537  | -1.7556679 | -0.9203499 |
| H | 3.7151407  | -2.4754528 | -1.4611859 |
| H | 3.6431577  | -1.8606709 | -0.0331600 |
| O | -1.7017599 | 1.6979839  | -2.3379948 |
| H | -2.1832168 | 2.3176878  | -2.8971968 |
| H | -2.3276638 | 1.4438259  | -1.6137679 |
| O | 2.8662698  | -1.6281269 | 1.5613159  |

|   |            |            |            |
|---|------------|------------|------------|
| H | 1.9039699  | -1.7953989 | 1.5478579  |
| H | 2.9188098  | -0.6651679 | 1.7160719  |
| O | 2.8367198  | 1.2328349  | 1.5819069  |
| H | 2.0278028  | 1.7982229  | 1.6088839  |
| H | 3.5351587  | 1.7332949  | 2.0198408  |
| O | -1.9875238 | 1.8386739  | 1.9677538  |
| H | -1.0870469 | 2.1496358  | 1.7335289  |
| H | -1.8562979 | 0.9267819  | 2.2719198  |
| O | 0.6850629  | 2.6138438  | -1.4036639 |
| H | -0.1530520 | 2.2548568  | -1.7827209 |
| H | 1.3956899  | 1.9895338  | -1.6225189 |
| O | 0.5706200  | 2.7443348  | 1.2448059  |
| H | 0.5869750  | 2.7496028  | 0.2443450  |
| H | 0.6800709  | 3.6626777  | 1.5213399  |

-----

### E. Water Cluster - Size 12 - B3LYP/def2TZVP Method Group

s0:

|   |            |            |            |
|---|------------|------------|------------|
| C | -1.2853389 | -0.1466180 | -0.6680039 |
| C | -0.3985810 | -0.9900399 | 0.0122850  |
| C | 0.8568839  | -1.3006999 | -0.5845020 |
| C | 1.2449439  | -0.7696399 | -1.8185279 |
| C | 0.3483480  | 0.0653650  | -2.4681778 |
| C | -0.9061999 | 0.3722710  | -1.9003479 |
| C | -0.4402660 | -1.6919489 | 1.2638519  |
| C | 0.7493959  | -2.3739388 | 1.3742469  |
| N | 1.5262999  | -2.1453338 | 0.2651450  |
| H | -2.2425728 | 0.1110650  | -0.2345010 |
| H | 2.2019648  | -1.0177589 | -2.2589678 |

|   |            |            |            |
|---|------------|------------|------------|
| H | 0.6133640  | 0.4884680  | -3.4279817 |
| H | -1.5871549 | 1.0167409  | -2.4431978 |
| H | -1.2495909 | -1.6965319 | 1.9749178  |
| H | 1.1049309  | -3.0132558 | 2.1655828  |
| H | 2.5015898  | -2.4445438 | 0.1464930  |
| O | 4.9956026  | 0.0100930  | 0.4181640  |
| H | 4.1876467  | 0.5658800  | 0.3783550  |
| H | 5.6271426  | 0.4221200  | -0.1820780 |
| O | -2.4766938 | -3.6440597 | -0.2181060 |
| H | -2.3423258 | -3.3220977 | -1.1358819 |
| H | -1.6274189 | -3.4832617 | 0.2167620  |
| O | 4.2840217  | -2.5727688 | -0.1326090 |
| H | 4.7852306  | -3.1720398 | 0.4313610  |
| H | 4.6174206  | -1.6668499 | 0.0677710  |
| O | -2.0386948 | -2.6257818 | -2.7667808 |
| H | -1.3489419 | -3.0627058 | -3.2806807 |
| H | -1.7237429 | -1.7179139 | -2.6390628 |
| O | -4.0338167 | -1.9901148 | 1.3659279  |
| H | -4.1182087 | -2.4881158 | 2.1864508  |
| H | -3.5164697 | -2.5696628 | 0.7622129  |
| O | -3.7802347 | 0.8082279  | 1.7002679  |
| H | -3.7361527 | -0.1610970 | 1.6108239  |
| H | -2.8824758 | 1.1274999  | 1.9178949  |
| O | -2.6656038 | 4.7453886  | -1.5416389 |
| H | -2.4084918 | 4.7871716  | -2.4688038 |
| H | -1.9551629 | 4.2329287  | -1.1091389 |
| O | 1.1029569  | 0.7716559  | 2.6207488  |
| H | 0.8156839  | -0.1397950 | 2.4590198  |
| H | 1.6508749  | 0.9925099  | 1.8401369  |
| O | -0.6677009 | 3.1964888  | -0.3069750 |
| H | -0.6074340 | 2.3575468  | -0.7888979 |

|   |            |           |            |
|---|------------|-----------|------------|
| H | 0.2397310  | 3.5617817 | -0.2975590 |
| O | 2.5796908  | 1.3595289 | 0.2827290  |
| H | 2.1082428  | 0.9176099 | -0.4401640 |
| H | 2.4969638  | 2.3196338 | 0.1036060  |
| O | -1.3385679 | 2.1135528 | 2.2327728  |
| H | -1.1550339 | 2.5688288 | 1.3894999  |
| H | -0.5019150 | 1.6454989 | 2.4342118  |
| O | 2.0102068  | 4.0471587 | -0.1701010 |
| H | 2.3860548  | 4.4794277 | -0.9482789 |
| H | 2.1977198  | 4.6347876 | 0.5739400  |

-----  
La:

|   |            |            |            |
|---|------------|------------|------------|
| C | 1.1206149  | 0.1713300  | 1.3686919  |
| C | 0.5164950  | -0.6699779 | 0.3867010  |
| C | -0.7234329 | -1.2497669 | 0.6104450  |
| C | -1.5279299 | -0.9905179 | 1.7442189  |
| C | -0.8811409 | -0.1891920 | 2.7522138  |
| C | 0.3625110  | 0.3751140  | 2.5693098  |
| C | 0.9545429  | -1.1193729 | -0.9048939 |
| C | -0.0676780 | -1.9677548 | -1.4282929 |
| N | -1.0416819 | -2.0339258 | -0.5276270 |
| H | 2.0577288  | 0.6772529  | 1.1853249  |
| H | -2.4232408 | -1.5567819 | 1.9566879  |
| H | -1.4064209 | -0.0119180 | 3.6826967  |
| H | 0.7836259  | 0.9873079  | 3.3571627  |
| H | 1.8793369  | -0.8822999 | -1.4023089 |
| H | -0.1114390 | -2.4907758 | -2.3681528 |
| H | -1.9563019 | -2.5115878 | -0.6599819 |
| O | -5.0552236 | -0.7268269 | -0.6484090 |
| H | -4.4203907 | -0.0203880 | -0.3949230 |

|   |            |            |            |
|---|------------|------------|------------|
| H | -5.7556416 | -0.7030119 | 0.0133000  |
| O | 3.5219847  | -3.0803128 | -0.0314120 |
| H | 3.1826218  | -2.8532118 | 0.8658089  |
| H | 2.8257468  | -3.5982867 | -0.4513190 |
| O | -3.5945807 | -3.0199388 | -0.7669469 |
| H | -3.8561207 | -3.5288517 | -1.5423769 |
| H | -4.1842377 | -2.2270728 | -0.7427569 |
| O | 2.6293268  | -2.2668908 | 2.4208718  |
| H | 1.9654318  | -2.8123718 | 2.8597648  |
| H | 2.1680798  | -1.4285919 | 2.2036458  |
| O | 4.2919437  | -0.8958949 | -1.4904549 |
| H | 4.5881016  | -1.2336969 | -2.3427108 |
| H | 4.0343857  | -1.6860579 | -0.9609739 |
| O | 3.3221197  | 1.7266829  | -1.5732239 |
| H | 3.6175677  | 0.7982159  | -1.5076999 |
| H | 2.3913208  | 1.7148649  | -1.8823979 |
| O | 3.0269258  | 3.4316787  | 0.6290740  |
| H | 3.2089718  | 2.8102638  | -0.1063800 |
| H | 2.0581628  | 3.4688187  | 0.6666809  |
| O | -1.7345049 | 0.7607649  | -2.4757088 |
| H | -1.7847389 | -0.1634070 | -2.7439248 |
| H | -2.1796638 | 0.8090929  | -1.6011089 |
| O | 0.1678120  | 2.9645278  | 0.4609060  |
| H | 0.2628180  | 2.0828598  | 0.8676309  |
| H | -0.7379889 | 3.2629258  | 0.6692579  |
| O | -2.9921338 | 0.9589649  | -0.0029890 |
| H | -2.5286878 | 0.4168410  | 0.6800679  |
| H | -2.9642858 | 1.8823209  | 0.3190130  |
| O | 0.6617869  | 2.1481828  | -2.1655138 |
| H | 0.4450780  | 2.5232358  | -1.2877139 |
| H | -0.0995120 | 1.5667089  | -2.3655238 |



|   |            |           |           |
|---|------------|-----------|-----------|
| O | -2.5628618 | 3.5856407 | 0.8944059 |
| H | -2.8445478 | 3.7977447 | 1.7938359 |
| H | -2.9086318 | 4.2955507 | 0.3376090 |

-----

### F. Water Cluster - Size 15 - B3LYP/def2TZVP Method Group

s0:

|   |            |            |            |
|---|------------|------------|------------|
| C | 0.6545170  | 0.6109900  | 0.4931890  |
| C | 0.1169290  | -0.3663460 | -0.3708190 |
| C | -0.9308309 | -1.2163709 | 0.1099800  |
| C | -1.4349029 | -1.1192569 | 1.4131169  |
| C | -0.8638199 | -0.1601290 | 2.2576838  |
| C | 0.1723700  | 0.6940229  | 1.8002359  |
| C | 0.3432930  | -0.7345829 | -1.7492919 |
| C | -0.5424940 | -1.7534359 | -2.0465248 |
| N | -1.3030849 | -2.0633648 | -0.9247389 |
| H | 1.4031099  | 1.3119319  | 0.1463990  |
| H | -2.2551368 | -1.7469889 | 1.7374169  |
| H | -1.2356319 | -0.0512910 | 3.2702868  |
| H | 0.5573440  | 1.4665159  | 2.4542508  |
| H | 1.0688539  | -0.3015850 | -2.4190758 |
| H | -0.6843859 | -2.2901478 | -2.9710458 |
| H | -2.1523468 | -2.6751108 | -0.8654919 |
| O | -4.6249126 | 0.9924359  | -0.4510530 |
| H | -3.7816617 | 1.4948159  | -0.2091740 |
| H | -4.8324106 | 1.0922469  | -1.3954329 |
| O | 1.0798829  | -3.7628727 | 0.0863520  |
| H | 1.2641619  | -3.2748137 | 0.9642689  |
| H | 0.1817580  | -3.5523417 | -0.2336520 |

|   |            |            |            |
|---|------------|------------|------------|
| O | -4.8575146 | -1.3508459 | 0.5689490  |
| H | -5.0324706 | -1.3078829 | 1.5230059  |
| H | -4.7718296 | -0.4192110 | 0.1608870  |
| O | 1.6331069  | -2.4277608 | 2.2113338  |
| H | 1.0238279  | -1.7183239 | 2.4850288  |
| H | 2.6045928  | -2.1666348 | 2.3262498  |
| O | 3.2994947  | -0.9282039 | -0.2297610 |
| H | 3.2517358  | -1.7586629 | -0.8502419 |
| H | 2.4060678  | -0.8140219 | 0.1598160  |
| O | 3.4592467  | 1.5167959  | -1.3582029 |
| H | 3.4838767  | 0.5898120  | -0.9914659 |
| H | 2.6647018  | 1.6737539  | -1.9281369 |
| O | 0.9454669  | 4.0383217  | 1.7716089  |
| H | 1.3777929  | 3.9787587  | 2.6372318  |
| H | 1.5813059  | 3.8656547  | 0.9807319  |
| O | -1.2240599 | 1.8700359  | -2.2065178 |
| H | -1.1963969 | 0.9210399  | -2.4389668 |
| H | -1.6521229 | 1.9694208  | -1.2957699 |
| O | 2.3691308  | 3.6503217  | -0.2872550 |
| H | 3.0187988  | 2.8976408  | -0.3922670 |
| H | 1.7879129  | 3.5460817  | -1.0943449 |
| O | -2.3217048 | 2.0039618  | 0.1846650  |
| H | -1.9553579 | 1.2605059  | 0.7044639  |
| H | -2.0574908 | 2.9067408  | 0.6608619  |
| O | 1.1980929  | 2.6769808  | -2.4576348 |
| H | 1.3427649  | 3.0899888  | -3.3276447 |
| H | 0.2188880  | 2.3817338  | -2.3531408 |
| O | -1.5310759 | 4.0498697  | 1.3519219  |
| H | -0.5206460 | 4.0627957  | 1.5647279  |
| H | -1.8908779 | 4.9366986  | 1.1929809  |
| O | -3.5787517 | -3.3257587 | -0.4320250 |

|   |            |            |            |
|---|------------|------------|------------|
| H | -4.1388037 | -2.5747828 | -0.0214510 |
| H | -3.5965917 | -4.1229127 | 0.1246370  |
| O | 2.8970758  | -3.0483928 | -1.5513449 |
| H | 2.1562978  | -3.4402827 | -0.9510749 |
| H | 2.5920868  | -2.9620788 | -2.4709878 |
| O | 4.1201297  | -1.6881679 | 2.1387678  |
| H | 4.0588707  | -1.3432899 | 1.1954039  |
| H | 4.8318136  | -2.3453228 | 2.2300238  |

-----  
La:

|   |            |            |            |
|---|------------|------------|------------|
| C | 0.8561939  | -0.1459860 | -0.4010580 |
| C | -0.1224520 | 0.3041200  | 0.5441020  |
| C | -1.3204579 | 0.8763799  | 0.1338100  |
| C | -1.6756619 | 1.1068969  | -1.2264479 |
| C | -0.7550779 | 0.5314870  | -2.1722528 |
| C | 0.4446240  | -0.0655010 | -1.7867599 |
| C | -0.1311970 | 0.3231610  | 2.0016038  |
| C | -1.3706849 | 0.9104829  | 2.4115558  |
| N | -2.0621828 | 1.2314429  | 1.3069669  |
| H | 1.6317309  | -0.8452399 | -0.1092250 |
| H | -2.6764498 | 1.4015939  | -1.5108929 |
| H | -1.0153989 | 0.5577840  | -3.2263328 |
| H | 1.0775279  | -0.5317390 | -2.5353088 |
| H | 0.6401460  | -0.0419350 | 2.6584708  |
| H | -1.7534699 | 1.0702079  | 3.4054277  |
| H | -3.0604298 | 1.6183629  | 1.2525349  |
| O | -3.9401507 | -2.0634888 | -0.4257090 |
| H | -2.9623308 | -2.2593118 | -0.5902280 |
| H | -4.3018557 | -2.6302538 | 0.2749680  |
| O | -0.0684840 | 3.6742517  | -0.8193839 |

|   |            |            |            |
|---|------------|------------|------------|
| H | 0.6691319  | 3.4703027  | -1.4908459 |
| H | -0.7997849 | 3.0295138  | -0.9842049 |
| O | -5.0658576 | 0.1858160  | -0.8202059 |
| H | -5.1878526 | 0.3848210  | -1.7625329 |
| H | -4.6002396 | -0.7150059 | -0.6783819 |
| O | 1.7566269  | 2.8647368  | -2.4872528 |
| H | 1.4628329  | 1.9399009  | -2.6138928 |
| H | 2.6957758  | 2.8876408  | -2.1018878 |
| O | 2.7301238  | 1.7265139  | 0.7069939  |
| H | 2.1111828  | 2.4145288  | 1.1578519  |
| H | 2.1355728  | 1.1585749  | 0.1179550  |
| O | 3.5920957  | -0.5116820 | 1.9090659  |
| H | 3.3338437  | 0.3931370  | 1.5727689  |
| H | 2.8298508  | -0.9701109 | 2.3413508  |
| O | 2.3361748  | -3.1026438 | -1.8874819 |
| H | 3.0060978  | -3.3331597 | -2.5515138 |
| H | 2.7509408  | -2.8976018 | -0.9689299 |
| O | -0.8109959 | -2.5402648 | 1.7993689  |
| H | -1.5408659 | -2.2192138 | 2.3543508  |
| H | -1.0381879 | -2.4798178 | 0.8116379  |
| O | 3.2565858  | -2.6685798 | 0.4414140  |
| H | 3.6421427  | -1.7932629 | 0.7387429  |
| H | 2.5897788  | -2.8630698 | 1.1572279  |
| O | -1.3854389 | -2.4235978 | -0.7405539 |
| H | -1.0437979 | -1.5785709 | -1.1066739 |
| H | -0.8821259 | -3.2103468 | -1.2198799 |
| O | 1.6272729  | -2.3858398 | 2.5395768  |
| H | 1.7863279  | -2.8834298 | 3.3616327  |
| H | 0.6382750  | -2.4354448 | 2.2705828  |
| O | 0.0347900  | -4.1442717 | -1.8524189 |
| H | 0.9948209  | -3.7651867 | -1.9068819 |

|   |            |            |            |
|---|------------|------------|------------|
| H | -0.2285380 | -4.6013766 | -2.6677068 |
| O | -4.4861457 | 1.9898118  | 0.8511089  |
| H | -4.8096026 | 1.2960329  | 0.1640440  |
| H | -5.1739256 | 2.2328968  | 1.4920599  |
| O | 0.9801319  | 3.4032707  | 1.4914769  |
| H | 0.4842240  | 3.5728307  | 0.6025010  |
| H | 0.3688200  | 3.2402078  | 2.2297208  |
| O | 4.0226997  | 2.8586868  | -1.2277829 |
| H | 3.6718537  | 2.4332068  | -0.3748330 |
| H | 4.8021276  | 2.3844278  | -1.5654899 |

-----

### G. Water Cluster - Size 3a - B3LYP/aug-cc-pVXZ Method Group

s0:

|   |            |            |            |
|---|------------|------------|------------|
| C | 2.7763978  | -1.0503709 | -0.1739720 |
| C | 1.3753269  | -1.0257589 | -0.1860550 |
| C | 0.7126509  | 0.2216340  | -0.3363020 |
| C | 1.4084029  | 1.4210049  | -0.4763190 |
| C | 2.7927408  | 1.3630869  | -0.4650300 |
| C | 3.4697507  | 0.1395930  | -0.3139970 |
| C | 0.3526890  | -2.0259778 | -0.0715410 |
| C | -0.8510899 | -1.3819989 | -0.1487320 |
| N | -0.6434980 | -0.0231180 | -0.2855960 |
| H | 3.3074027  | -1.9857538 | -0.0574880 |
| H | 0.8869529  | 2.3616278  | -0.5876000 |
| H | 3.3633477  | 2.2751668  | -0.5727410 |
| H | 4.5511357  | 0.1331240  | -0.3072700 |
| H | 0.4955750  | -3.0850418 | 0.0582420  |
| H | -1.8558629 | -1.7663459 | -0.1096640 |

|   |            |            |            |
|---|------------|------------|------------|
| H | -1.3775279 | 0.6516940  | -0.4702110 |
| O | -3.0320238 | 1.6432009  | -0.7036429 |
| H | -3.1751288 | 2.0626268  | -1.5598469 |
| H | -3.2107138 | 2.3264268  | -0.0472390 |
| O | -0.4264690 | 0.6236800  | 2.8179268  |
| H | -0.5813960 | 0.3909460  | 1.8925429  |
| H | 0.4950450  | 0.9017929  | 2.8417278  |
| O | -4.2275197 | -0.9165639 | -0.2878460 |
| H | -3.9406037 | 0.0009510  | -0.4345050 |
| H | -5.1868536 | -0.8751929 | -0.2266050 |

-----  
La:

|   |            |            |            |
|---|------------|------------|------------|
| C | 2.4668708  | -1.1176879 | -0.4387390 |
| C | 1.0436959  | -1.0190369 | -0.3668380 |
| C | 0.4190300  | 0.2321130  | -0.3882500 |
| C | 1.1122349  | 1.4458929  | -0.4563460 |
| C | 2.5258358  | 1.3125219  | -0.7316659 |
| C | 3.1662178  | 0.0938470  | -0.7111179 |
| C | 0.0216110  | -1.9850538 | -0.1792470 |
| C | -1.2234439 | -1.2892459 | -0.0913630 |
| N | -0.9628909 | 0.0091320  | -0.2257500 |
| H | 2.9621448  | -2.0766108 | -0.4542580 |
| H | 0.6108430  | 2.3992238  | -0.5064090 |
| H | 3.0985388  | 2.2086918  | -0.9289639 |
| H | 4.2334607  | 0.0585480  | -0.8842679 |
| H | 0.1356150  | -3.0523858 | -0.0993170 |
| H | -2.2291648 | -1.6531009 | 0.0288390  |
| H | -1.6786539 | 0.7372239  | -0.2023030 |
| O | -3.2334918 | 1.7741149  | -0.1037530 |
| H | -3.4552327 | 2.2843878  | -0.8913729 |

|   |            |            |            |
|---|------------|------------|------------|
| H | -3.2883087 | 2.3944348  | 0.6326140  |
| O | 2.0316348  | 0.3559230  | 2.5079958  |
| H | 2.3745418  | -0.3363520 | 1.9179259  |
| H | 1.6339829  | 0.9870639  | 1.8849189  |
| O | -4.4759417 | -0.7870259 | 0.2772420  |
| H | -4.2005677 | 0.1313740  | 0.1195200  |
| H | -5.2268806 | -0.9306089 | -0.3071410 |

-----

#### H. Water Cluster - Size 3b - B3LYP/aug-cc-pVXZ Method Group

s0:

|   |            |            |            |
|---|------------|------------|------------|
| C | -2.9889748 | 0.0519340  | 0.3623280  |
| C | -1.7964519 | 0.7444239  | 0.1119700  |
| C | -0.6889299 | 0.0331740  | -0.4218840 |
| C | -0.7491569 | -1.3295529 | -0.7088489 |
| C | -1.9429969 | -1.9849858 | -0.4548750 |
| C | -3.0513678 | -1.3011009 | 0.0766710  |
| C | -1.3725099 | 2.1055238  | 0.2740470  |
| C | -0.0729460 | 2.1731908  | -0.1468160 |
| N | 0.3574870  | 0.9236599  | -0.5468660 |
| H | -3.8474337 | 0.5677970  | 0.7714769  |
| H | 0.1048900  | -1.8547049 | -1.1133129 |
| H | -2.0244008 | -3.0419498 | -0.6677939 |
| H | -3.9664287 | -1.8461429 | 0.2639990  |
| H | -1.9559969 | 2.9240828  | 0.6591979  |
| H | 0.5974690  | 3.0142788  | -0.1873890 |
| H | 1.2473029  | 0.7255509  | -1.0089409 |
| O | 2.8713378  | 0.1576620  | -1.6967309 |
| H | 3.4727517  | 0.8379559  | -2.0153548 |

|   |           |            |            |
|---|-----------|------------|------------|
| H | 3.3156637 | -0.2560990 | -0.9235509 |
| O | 1.6749159 | -0.1088470 | 2.0701038  |
| H | 1.1389819 | 0.2696970  | 1.3566159  |
| H | 1.1131239 | -0.7735109 | 2.4834198  |
| O | 3.8584007 | -0.9620059 | 0.6082660  |
| H | 3.9372837 | -1.9212919 | 0.5946070  |
| H | 3.1071558 | -0.7614049 | 1.2064169  |

-----  
La:

|   |            |            |            |
|---|------------|------------|------------|
| C | -2.9219348 | -0.2035370 | 0.3527010  |
| C | -1.8157259 | 0.6933889  | 0.2792720  |
| C | -0.6342770 | 0.3174740  | -0.3636070 |
| C | -0.4170910 | -0.9492639 | -0.9310879 |
| C | -1.5962169 | -1.7981079 | -0.9521639 |
| C | -2.7695688 | -1.4431919 | -0.3249810 |
| C | -1.6094439 | 2.0104928  | 0.7724049  |
| C | -0.2813660 | 2.4023008  | 0.4179460  |
| N | 0.2691930  | 1.3960459  | -0.2530030 |
| H | -3.8432097 | 0.0736390  | 0.8415939  |
| H | 0.4295480  | -1.1498929 | -1.5710329 |
| H | -1.5336409 | -2.7519198 | -1.4584369 |
| H | -3.6024007 | -2.1340448 | -0.3484950 |
| H | -2.3070708 | 2.6236988  | 1.3165769  |
| H | 0.2416400  | 3.3212877  | 0.6119660  |
| H | 1.2425659  | 1.3791909  | -0.6005840 |
| O | 2.9072478  | 1.1728119  | -1.1078409 |
| H | 3.4769977  | 1.9374589  | -0.9771419 |
| H | 3.2779167  | 0.4544550  | -0.5420970 |
| O | 1.3420549  | -1.8685709 | 1.3543459  |
| H | 0.7117639  | -1.6578969 | 0.6218180  |



|   |           |            |           |
|---|-----------|------------|-----------|
| H | 1.2872599 | -2.8234328 | 1.4758679 |
| O | 3.7330967 | -0.8532939 | 0.5052080 |
| H | 4.2415597 | -1.5412189 | 0.0636730 |
| H | 2.9072618 | -1.2885639 | 0.8207109 |

-----

**I. Water Cluster - Size 6 - B3LYP/aug-cc-pVXZ Method Group**

s0:

|   |            |            |            |
|---|------------|------------|------------|
| C | 1.7284619  | 1.7644749  | -1.1739169 |
| C | 1.0502249  | 0.5538220  | -0.9349129 |
| C | 0.4802180  | 0.3202890  | 0.3490320  |
| C | 0.5687840  | 1.2563199  | 1.3889699  |
| C | 1.2319169  | 2.4533718  | 1.1184409  |
| C | 1.8070059  | 2.7029948  | -0.1490250 |
| C | 0.7502999  | -0.6109650 | -1.7378719 |
| C | 0.0277710  | -1.4729519 | -0.9352679 |
| N | -0.1144730 | -0.9302489 | 0.3253840  |
| H | 2.1779898  | 1.9642229  | -2.1460908 |
| H | 0.1483730  | 1.0516039  | 2.3725648  |
| H | 1.3178029  | 3.2053988  | 1.9020229  |
| H | 2.3218398  | 3.6478597  | -0.3210410 |
| H | 1.0204539  | -0.7797559 | -2.7750028 |
| H | -0.4066480 | -2.4380848 | -1.1681809 |
| H | -0.8222929 | -1.2198409 | 0.9989419  |
| O | -2.5815218 | -0.7797949 | 1.7989569  |
| H | -2.6455998 | 0.1668300  | 1.5578669  |
| H | -2.9360828 | -0.8545579 | 2.6930148  |
| O | 3.5394637  | -1.7792269 | -0.6278310 |
| H | 4.1137327  | -1.0024309 | -0.5997110 |

|   |            |            |            |
|---|------------|------------|------------|
| H | 2.7372578  | -1.4707539 | -1.0829229 |
| O | -3.6339617 | -1.8263939 | -0.6925069 |
| H | -3.3779227 | -1.6150089 | 0.2223050  |
| H | -3.2575548 | -1.0833439 | -1.2044449 |
| O | 2.3823568  | -2.4022238 | 1.8792089  |
| H | 1.4913989  | -2.0643158 | 1.7175489  |
| H | 2.8549838  | -2.1989728 | 1.0468819  |
| O | -2.4351738 | 0.4654770  | -1.9177579 |
| H | -1.5132179 | 0.1912670  | -2.0438348 |
| H | -2.4208148 | 1.0078029  | -1.1053129 |
| O | -2.4302108 | 1.7692149  | 0.6233370  |
| H | -1.5493369 | 2.1279238  | 0.8185719  |
| H | -3.0487528 | 2.4953428  | 0.7791859  |

-----

La:

|   |            |            |            |
|---|------------|------------|------------|
| C | 1.9049549  | -0.4168610 | -1.6389079 |
| C | 0.8851669  | -0.8191669 | -0.7143789 |
| C | 0.3058760  | 0.0974160  | 0.1674510  |
| C | 0.6426400  | 1.4729659  | 0.2180720  |
| C | 1.6430589  | 1.8738459  | -0.7547059 |
| C | 2.2249968  | 0.9821049  | -1.6401059 |
| C | 0.3100950  | -2.0998038 | -0.4138920 |
| C | -0.6428330 | -1.9064359 | 0.6412080  |
| N | -0.6257020 | -0.6147960 | 0.9668029  |
| H | 2.2608438  | -1.0895529 | -2.4162938 |
| H | 0.3154060  | 2.1329498  | 1.0186729  |
| H | 1.9426649  | 2.9213638  | -0.7848719 |
| H | 2.9612918  | 1.3554989  | -2.3520208 |
| H | 0.5431380  | -3.0533678 | -0.8751939 |
| H | -1.3229089 | -2.6118368 | 1.1016349  |

|   |            |            |            |
|---|------------|------------|------------|
| H | -1.3092859 | -0.1606660 | 1.5855179  |
| O | -2.8777218 | 0.8346049  | 1.7985939  |
| H | -2.7893008 | 1.4692409  | 1.0560449  |
| H | -3.1582898 | 1.3466449  | 2.5666648  |
| O | 4.1204377  | -1.0658029 | 0.3750250  |
| H | 3.4787897  | -0.9244829 | -0.3587490 |
| H | 4.0556007  | -2.0096158 | 0.5730470  |
| O | -4.0325617 | -1.3858819 | 0.2940000  |
| H | -3.7970337 | -0.6889019 | 0.9295139  |
| H | -3.5289097 | -1.1404339 | -0.5068130 |
| O | 2.9746798  | 0.6242070  | 2.3274888  |
| H | 2.2419908  | 1.0048529  | 1.8171589  |
| H | 3.4010917  | 0.0106810  | 1.6940679  |
| O | -2.5846218 | -0.3606760 | -1.9434699 |
| H | -1.6999389 | -0.6927669 | -2.1431898 |
| H | -2.4389218 | 0.5370800  | -1.5802879 |
| O | -2.1926378 | 2.0713738  | -0.5856520 |
| H | -1.2161779 | 2.1251728  | -0.4599570 |
| H | -2.4644588 | 2.9247278  | -0.9488869 |

-----

## J. Water Cluster - Size 9 - B3LYP/aug-cc-pVXZ Method Group

s0:

|   |            |            |            |
|---|------------|------------|------------|
| C | -2.6668258 | -2.0662838 | -0.0543320 |
| C | -1.7360419 | -1.2999479 | -0.7818709 |
| C | -0.6258490 | -0.7197379 | -0.0939440 |
| C | -0.4295440 | -0.8864849 | 1.2846099  |
| C | -1.3612649 | -1.6598419 | 1.9756918  |
| C | -2.4699118 | -2.2431558 | 1.3146469  |

|   |            |            |            |
|---|------------|------------|------------|
| C | -1.6183419 | -0.9066329 | -2.1633648 |
| C | -0.4727610 | -0.1404150 | -2.2603438 |
| N | 0.1139560  | -0.0191660 | -1.0205789 |
| H | -3.5265097 | -2.5129218 | -0.5528750 |
| H | 0.3984660  | -0.4056940 | 1.8013959  |
| H | -1.2411899 | -1.8092239 | 3.0481198  |
| H | -3.1771288 | -2.8405598 | 1.8890659  |
| H | -2.2807658 | -1.1728359 | -2.9796998 |
| H | -0.0278290 | 0.3378860  | -3.1259548 |
| H | 1.0208639  | 0.4135690  | -0.8535099 |
| O | 2.9869558  | 0.7865269  | -0.9635989 |
| H | 3.2879717  | 0.3922200  | -0.1189360 |
| H | 3.0001588  | 0.0315150  | -1.5919929 |
| O | -2.8298748 | 1.8974239  | -1.0208389 |
| H | -3.0735328 | 1.5397369  | -0.1380920 |
| H | -2.5332258 | 1.1233149  | -1.5269989 |
| O | 2.8312368  | -1.6558909 | -2.2864318 |
| H | 2.0664528  | -1.7509609 | -2.8683558 |
| H | 2.5628538  | -2.0826358 | -1.4384679 |
| O | -0.7151979 | 3.5932957  | -0.8715319 |
| H | -1.0739649 | 4.4532457  | -0.6221620 |
| H | -1.4898459 | 2.9781638  | -0.8966939 |
| O | 2.2503168  | -2.6045118 | 0.2407980  |
| H | 1.3024899  | -2.5777958 | 0.4330270  |
| H | 2.6305768  | -1.8866029 | 0.7921629  |
| O | 3.3752357  | -0.4136460 | 1.5348029  |
| H | 2.8317908  | 0.2438080  | 2.0436628  |
| H | 4.2190267  | -0.4891800 | 1.9964458  |
| O | -3.5123337 | 0.9027109  | 1.4766009  |
| H | -3.0285028 | 1.3606669  | 2.1765148  |
| H | -3.1990858 | -0.0158800 | 1.5274569  |

|   |           |           |            |
|---|-----------|-----------|------------|
| O | 1.6374589 | 2.9024338 | 0.3242860  |
| H | 0.7716639 | 3.1273678 | -0.0889940 |
| H | 2.0932048 | 2.3156428 | -0.3066870 |
| O | 1.7506289 | 1.4478139 | 2.5821898  |
| H | 1.6502529 | 2.0496718 | 1.7974719  |
| H | 2.1059388 | 1.9973938 | 3.2913737  |

-----

La:

|   |            |            |            |
|---|------------|------------|------------|
| C | 2.6294918  | -2.0256648 | -0.5684460 |
| C | 1.5766969  | -1.7469689 | 0.3635880  |
| C | 0.4319830  | -1.0471029 | -0.0322310 |
| C | 0.1676110  | -0.6394290 | -1.3598299 |
| C | 1.2392249  | -0.9434629 | -2.2956358 |
| C | 2.3989018  | -1.6043809 | -1.9161539 |
| C | 1.4393589  | -2.0052528 | 1.7680299  |
| C | 0.1875830  | -1.4430309 | 2.1857128  |
| N | -0.3798490 | -0.8854189 | 1.1168729  |
| H | 3.5075357  | -2.6006038 | -0.2840990 |
| H | -0.5756750 | 0.1153400  | -1.5931909 |
| H | 1.1096259  | -0.6649319 | -3.3426397 |
| H | 3.1557248  | -1.8143089 | -2.6727488 |
| H | 2.1436848  | -2.5115588 | 2.4193248  |
| H | -0.2650800 | -1.4090159 | 3.1689188  |
| H | -1.2796479 | -0.3728120 | 1.1323219  |
| O | -2.8019618 | 0.5350050  | 1.2317619  |
| H | -2.9398528 | 0.9148059  | 0.3375630  |
| H | -3.3402197 | -0.2895840 | 1.2254139  |
| O | 3.3574637  | 0.9726779  | 0.3885670  |
| H | 2.9098798  | 1.4366689  | -0.3571780 |
| H | 3.3281847  | 0.0320410  | 0.1309490  |

|   |            |            |            |
|---|------------|------------|------------|
| O | -3.9952007 | -1.8850229 | 0.6963899  |
| H | -3.5871897 | -2.6369578 | 1.1446339  |
| H | -3.5796267 | -1.8561369 | -0.1990590 |
| O | 1.7112669  | 1.3906159  | 2.5034938  |
| H | 2.1880198  | 1.9965588  | 3.0838728  |
| H | 2.3249668  | 1.2214659  | 1.7432379  |
| O | -2.8537628 | -1.4171239 | -1.7659729 |
| H | -1.8821929 | -1.5369859 | -1.7355119 |
| H | -2.9439848 | -0.4445100 | -1.7931209 |
| O | -2.8564598 | 1.4379989  | -1.4127529 |
| H | -2.0450358 | 1.9998288  | -1.3804959 |
| H | -3.5658097 | 2.0110628  | -1.7291549 |
| O | 2.0261478  | 2.0876598  | -1.7614629 |
| H | 1.1199259  | 2.3505788  | -1.4903049 |
| H | 1.9045379  | 1.2158889  | -2.1732038 |
| O | -0.6617399 | 2.4387088  | 1.6786749  |
| H | 0.1737590  | 2.0241098  | 2.0057248  |
| H | -1.3725209 | 1.7917519  | 1.8201509  |
| O | -0.5542310 | 2.8636858  | -0.9456129 |
| H | -0.5646120 | 2.7523858  | 0.0478760  |
| H | -0.6627309 | 3.8109637  | -1.1022829 |

-----

**K. Water Cluster - Size 12 - B3LYP/aug-cc-pVXZ Method Group**

s0:

|   |            |            |            |
|---|------------|------------|------------|
| C | 1.2265789  | -0.4117690 | 0.6928099  |
| C | 0.2273510  | -1.0295869 | -0.0812910 |
| C | -1.0874799 | -1.1633519 | 0.4609930  |
| C | -1.4263529 | -0.6744869 | 1.7331779  |

|   |            |            |            |
|---|------------|------------|------------|
| C | -0.4201740 | -0.0539040 | 2.4728568  |
| C | 0.8972019  | 0.0666720  | 1.9623319  |
| C | 0.1956720  | -1.6359829 | -1.3883159 |
| C | -1.0957349 | -2.0960168 | -1.5778349 |
| N | -1.8620819 | -1.8156069 | -0.4696480 |
| H | 2.2429518  | -0.3231090 | 0.3163620  |
| H | -2.4331738 | -0.7882879 | 2.1315068  |
| H | -0.6457020 | 0.3323050  | 3.4654317  |
| H | 1.6653119  | 0.5282240  | 2.5826018  |
| H | 1.0132639  | -1.7006749 | -2.0975108 |
| H | -1.5302089 | -2.6062978 | -2.4303508 |
| H | -2.8775608 | -1.9539079 | -0.3853280 |
| O | -4.8461746 | 0.9553039  | -0.2802870 |
| H | -3.9523567 | 1.3552769  | -0.1980860 |
| H | -5.3820696 | 1.3874189  | 0.3963740  |
| O | 1.8681979  | -3.9315587 | 0.1099290  |
| H | 1.5865049  | -3.7110667 | 1.0256589  |
| H | 1.1484449  | -3.5930387 | -0.4443440 |
| O | -4.6498126 | -1.7692829 | -0.0396010 |
| H | -5.2578496 | -2.1746248 | -0.6697819 |
| H | -4.7851886 | -0.7960939 | -0.1306890 |
| O | 1.1441579  | -3.1727878 | 2.6798228  |
| H | 0.3194830  | -3.5463157 | 3.0171518  |
| H | 0.9781569  | -2.2181328 | 2.6240858  |
| O | 3.8545387  | -2.1174428 | -0.5311810 |
| H | 4.6342776  | -2.6185408 | -0.7994269 |
| H | 3.1788888  | -2.7966468 | -0.2977410 |
| O | 3.2817507  | -0.3061840 | -2.6603898 |
| H | 3.4110097  | -0.8864879 | -1.8864119 |
| H | 2.7100148  | 0.4360330  | -2.3726458 |
| O | 3.6914287  | 4.1083587  | 1.4925539  |

|   |            |           |            |
|---|------------|-----------|------------|
| H | 3.5656747  | 4.2601467 | 2.4370578  |
| H | 2.8483938  | 3.7131527 | 1.1891569  |
| O | -1.0072789 | 1.1277979 | -2.5446238 |
| H | -0.8574469 | 0.1737620 | -2.4443898 |
| H | -1.4616619 | 1.3843879 | -1.7145739 |
| O | 1.3539169  | 2.9434708 | 0.4814580  |
| H | 1.1227179  | 2.1178418 | 0.9354479  |
| H | 0.5370580  | 3.4821717 | 0.4982390  |
| O | -2.2315248 | 1.8410499 | -0.1094010 |
| H | -1.8359369 | 1.2732569 | 0.5710610  |
| H | -1.9434989 | 2.7510718 | 0.1120650  |
| O | 1.6535139  | 1.9247419 | -2.1602878 |
| H | 1.6301959  | 2.3040908 | -1.2608539 |
| H | 0.7199569  | 1.6748459 | -2.3316938 |
| O | -1.0981299 | 4.3288937 | 0.4225230  |
| H | -1.3606189 | 4.8132796 | 1.2173829  |
| H | -1.1734869 | 4.9668796 | -0.3007020 |

-----  
La:

|   |            |            |            |
|---|------------|------------|------------|
| C | 1.3082339  | -0.1904240 | 0.9837709  |
| C | 0.4205100  | -0.8444139 | 0.0719350  |
| C | -0.8781679 | -1.1819799 | 0.4510590  |
| C | -1.4441619 | -0.8712349 | 1.7144599  |
| C | -0.4827330 | -0.3811950 | 2.6770828  |
| C | 0.8222929  | -0.0559650 | 2.3291198  |
| C | 0.5683960  | -1.2597619 | -1.2993669 |
| C | -0.6780419 | -1.8448239 | -1.7026749 |
| N | -1.5106739 | -1.7876079 | -0.6643669 |
| H | 2.3592908  | -0.0597000 | 0.7406399  |
| H | -2.4084008 | -1.2656019 | 2.0253578  |



|   |            |            |            |
|---|------------|------------|------------|
| H | -0.8044399 | -0.2450040 | 3.7095317  |
| H | 1.4872899  | 0.3418650  | 3.0953228  |
| H | 1.4352529  | -1.1428059 | -1.9396219 |
| H | -0.9649729 | -2.2741948 | -2.6551268 |
| H | -2.5140988 | -2.0671608 | -0.6778929 |
| O | -5.0321436 | 0.3655570  | -0.2725250 |
| H | -4.2191227 | 0.8754859  | -0.0523870 |
| H | -5.6431586 | 0.5283230  | 0.4569840  |
| O | 2.6793498  | -3.4524237 | 0.0421190  |
| H | 2.1542438  | -3.3552037 | 0.8699029  |
| H | 2.0462788  | -3.7417077 | -0.6266250 |
| O | -4.2203707 | -2.2214028 | -0.5456680 |
| H | -4.6739896 | -2.6114778 | -1.3030059 |
| H | -4.5821337 | -1.3047739 | -0.4586510 |
| O | 1.3382849  | -3.2071788 | 2.4426438  |
| H | 0.5521080  | -3.7622417 | 2.5248268  |
| H | 1.0099809  | -2.2954158 | 2.5560338  |
| O | 4.1123167  | -1.2093839 | -0.6731119 |
| H | 4.9956616  | -1.5396309 | -0.8775839 |
| H | 3.5933617  | -2.0078118 | -0.4188960 |
| O | 3.1465118  | 0.2260680  | -2.9336268 |
| H | 3.4632847  | -0.1984300 | -2.1130978 |
| H | 2.4411498  | 0.8555199  | -2.6708108 |
| O | 3.3488337  | 3.9874557  | 1.4206269  |
| H | 3.4019397  | 3.7176657  | 2.3454868  |
| H | 2.5440608  | 3.5423997  | 1.0775749  |
| O | -1.6046089 | 1.3246789  | -2.3895148 |
| H | -1.8908509 | 0.4830420  | -2.7660928 |
| H | -1.9433439 | 1.3266029  | -1.4660139 |
| O | 1.1041819  | 2.7442378  | 0.3419410  |
| H | 1.0844649  | 1.7958939  | 0.6162330  |

|   |            |           |            |
|---|------------|-----------|------------|
| H | 0.2496080  | 3.1239098 | 0.6269340  |
| O | -2.5761528 | 1.4726179 | 0.2105860  |
| H | -2.1878978 | 0.8057359 | 0.8273029  |
| H | -2.2935328 | 2.3443328 | 0.5538900  |
| O | 1.1005409  | 2.0437358 | -2.3764208 |
| H | 1.1495579  | 2.3794598 | -1.4582469 |
| H | 0.1798300  | 1.7148539 | -2.4469388 |
| O | -1.4119499 | 3.8680427 | 1.0660929  |
| H | -1.5175019 | 4.1353247 | 1.9895438  |
| H | -1.6255259 | 4.6567626 | 0.5485510  |

-----

#### L. Water Cluster - Size 15 - B3LYP/aug-cc-pVXZ Method Group

s0:

|   |            |            |            |
|---|------------|------------|------------|
| C | -0.4721280 | -0.5896040 | -0.5414720 |
| C | 0.4578000  | -0.0050480 | 0.3462460  |
| C | 1.2920219  | 1.0593899  | -0.1274960 |
| C | 1.2147739  | 1.5447829  | -1.4404689 |
| C | 0.2898570  | 0.9434599  | -2.2994358 |
| C | -0.5443010 | -0.1147910 | -1.8533849 |
| C | 0.7952889  | -0.2039950 | 1.7396689  |
| C | 1.7850839  | 0.7110019  | 2.0509698  |
| N | 2.1032958  | 1.4618159  | 0.9255789  |
| H | -1.1386769 | -1.3769909 | -0.2095900 |
| H | 1.8403449  | 2.3656758  | -1.7712369 |
| H | 0.1955190  | 1.3008399  | -3.3193037 |
| H | -1.2593149 | -0.5534730 | -2.5410268 |
| H | 0.3762210  | -0.9362439 | 2.4131578  |
| H | 2.2923588  | 0.8836439  | 2.9874148  |

|   |            |            |            |
|---|------------|------------|------------|
| H | 2.6632688  | 2.3323458  | 0.9095239  |
| O | -1.3254649 | 4.3415087  | 0.4206400  |
| H | -1.7787179 | 3.4605697  | 0.2375270  |
| H | -1.8656049 | 4.9197296  | 0.9848489  |
| O | 4.0389117  | -0.9183339 | -0.0683250 |
| H | 3.6155177  | -1.0165779 | -0.9856039 |
| H | 3.7261627  | -0.1019250 | 0.3673760  |
| O | 1.0261719  | 5.0861516  | -0.3719760 |
| H | 1.0184679  | 5.4515656  | -1.2725859 |
| H | 0.1024060  | 4.7919446  | -0.0781010 |
| O | 2.8604528  | -1.2649319 | -2.3801098 |
| H | 2.2433998  | -0.5442450 | -2.6106018 |
| H | 2.3967998  | -2.1610748 | -2.4123038 |
| O | 1.2646339  | -3.1951778 | 0.4269990  |
| H | 2.1754228  | -3.3523427 | 0.8524829  |
| H | 1.1384349  | -2.2242338 | 0.3742940  |
| O | -1.3128769 | -3.6778757 | 1.1995179  |
| H | -0.3440130 | -3.6291187 | 0.9870149  |
| H | -1.5821509 | -2.9910218 | 1.8573209  |
| O | -4.3738457 | -1.1095099 | -1.8077629 |
| H | -4.1936117 | -1.3920819 | -2.7194538 |
| H | -4.0189547 | -1.7639209 | -1.1104929 |
| O | -2.0963298 | 0.8539339  | 2.3363088  |
| H | -1.1503699 | 0.9424639  | 2.5663748  |
| H | -2.2627448 | 1.3031809  | 1.4529219  |
| O | -3.5478867 | -2.6311078 | 0.0917080  |
| H | -2.7570288 | -3.2267538 | 0.0914620  |
| H | -3.5097747 | -2.1630008 | 0.9717169  |
| O | -2.3771768 | 1.9787248  | -0.0724540 |
| H | -1.7320229 | 1.4752129  | -0.6113650 |
| H | -3.3171267 | 1.8255959  | -0.4594000 |

|   |            |            |            |
|---|------------|------------|------------|
| O | -2.7968388 | -1.6467139 | 2.4700388  |
| H | -3.2643008 | -1.8730639 | 3.2934097  |
| H | -2.5437418 | -0.6602539 | 2.4485548  |
| O | -4.5992256 | 1.3407789  | -1.1130589 |
| H | -4.5865746 | 0.3691940  | -1.4253679 |
| H | -5.4835406 | 1.7396279  | -1.0985779 |
| O | 3.1451138  | 3.9269457  | 0.5719080  |
| H | 2.3571248  | 4.4518817  | 0.2098140  |
| H | 3.8571197  | 4.4998727  | 0.9015959  |
| O | 3.7039647  | -3.1443088 | 1.2096209  |
| H | 3.9631127  | -2.2567088 | 0.7870879  |
| H | 4.2106087  | -3.3628787 | 2.0084718  |
| O | 1.6173189  | -3.5424587 | -2.1667718 |
| H | 1.4199099  | -3.6052817 | -1.1845139 |
| H | 1.7472309  | -4.4070257 | -2.5899228 |

-----  
La:

|   |            |            |            |
|---|------------|------------|------------|
| C | 0.6213890  | 0.3904380  | -0.7843059 |
| C | -0.3670100 | 0.1720900  | 0.2382130  |
| C | -1.6818709 | -0.1704340 | -0.0955830 |
| C | -2.1556658 | -0.3067820 | -1.4219879 |
| C | -1.1688829 | -0.0661450 | -2.4426578 |
| C | 0.1530680  | 0.2659810  | -2.1476098 |
| C | -0.3022780 | 0.2352270  | 1.6810399  |
| C | -1.6051879 | -0.1012090 | 2.1838098  |
| N | -2.4026318 | -0.3366390 | 1.1274719  |
| H | 1.6807879  | 0.4412930  | -0.5529900 |
| H | -3.1736138 | -0.5859050 | -1.6554599 |
| H | -1.4656669 | -0.1683790 | -3.4829997 |
| H | 0.8594729  | 0.4080480  | -2.9596928 |

|   |            |            |            |
|---|------------|------------|------------|
| H | 0.5524360  | 0.4917410  | 2.2854128  |
| H | -1.9449029 | -0.1902530 | 3.2026068  |
| H | -3.3835727 | -0.7071549 | 1.1603629  |
| O | -1.3185479 | -4.1045347 | -0.0926110 |
| H | -0.4883430 | -3.5444967 | -0.2135520 |
| H | -1.1047779 | -4.9769356 | 0.2799370  |
| O | -2.9529788 | 2.9496268  | 0.1741940  |
| H | -2.5316998 | 2.9817418  | -0.7530399 |
| H | -3.5638957 | 2.1983888  | 0.2652350  |
| O | -3.8197337 | -3.5632797 | -0.4849140 |
| H | -4.1101977 | -3.7248267 | -1.3983519 |
| H | -2.8327148 | -3.7602947 | -0.3625280 |
| O | -1.7312779 | 3.1018928  | -2.1113108 |
| H | -1.3720119 | 2.2297798  | -2.3810078 |
| H | -0.9998719 | 3.7933007  | -2.0713038 |
| O | 1.0029359  | 3.1814458  | 0.2612260  |
| H | 0.2625960  | 3.2946407  | 0.9524109  |
| H | 0.8468909  | 2.3264028  | -0.2336200 |
| O | 3.2685348  | 2.2069658  | 1.3824109  |
| H | 2.4592908  | 2.6729508  | 1.0326499  |
| H | 3.0245018  | 1.4513229  | 1.9709058  |
| O | 4.4283807  | -1.3804079 | -1.9176619 |
| H | 5.2266186  | -1.3199309 | -2.4677978 |
| H | 4.4539687  | -0.7496639 | -1.1150269 |
| O | 1.4822939  | -2.2980028 | 2.1962268  |
| H | 0.7666739  | -2.5167538 | 2.8173438  |
| H | 1.2315479  | -2.5045358 | 1.2406489  |
| O | 4.4296107  | 0.0957370  | 0.1785610  |
| H | 4.1507687  | 1.0449969  | 0.2579610  |
| H | 4.1008577  | -0.3284450 | 1.0156869  |
| O | 0.8754599  | -2.6615508 | -0.3397730 |

|   |            |            |            |
|---|------------|------------|------------|
| H | 0.7114349  | -1.7333549 | -0.6308640 |
| H | 1.6550299  | -3.0519878 | -0.8810699 |
| O | 3.1668468  | -0.3646430 | 2.5320068  |
| H | 3.6924257  | -0.4474020 | 3.3476057  |
| H | 2.4881688  | -1.1197149 | 2.4585668  |
| O | 2.9061868  | -3.4307677 | -1.6689089 |
| H | 3.5601847  | -2.6650318 | -1.8318859 |
| H | 2.9521998  | -4.1279127 | -2.3431638 |
| O | -4.7274096 | -1.5693689 | 0.8700099  |
| H | -4.4668287 | -2.3980168 | 0.3406250  |
| H | -5.5274276 | -1.6934659 | 1.4063299  |
| O | -1.0335189 | 3.4169517  | 1.8319249  |
| H | -1.8635779 | 3.2097428  | 1.2803259  |
| H | -1.1108399 | 3.1392218  | 2.7599928  |
| O | 0.2252400  | 4.7740526  | -1.6613269 |
| H | 0.6955929  | 4.2986557  | -0.9071119 |
| H | 0.8093639  | 5.3407866  | -2.1913838 |

-----

### M. Water Cluster - Size 3a - CAM-B3LYP/def2TZVP Method Group

s0:

|   |            |            |            |
|---|------------|------------|------------|
| C | 2.6852898  | -0.5927790 | -0.0105780 |
| C | 1.4060519  | -0.6241650 | -0.5751720 |
| C | 0.5702140  | 0.5049470  | -0.4411140 |
| C | 0.9748809  | 1.6483569  | 0.2433320  |
| C | 2.2384748  | 1.6485229  | 0.7906869  |
| C | 3.0882088  | 0.5378170  | 0.6635939  |
| C | 0.6545580  | -1.6052109 | -1.3027679 |
| C | -0.5596690 | -1.0438329 | -1.5776889 |

|   |            |            |            |
|---|------------|------------|------------|
| N | -0.6132160 | 0.2240410  | -1.0711069 |
| H | 3.3456677  | -1.4458349 | -0.0999630 |
| H | 0.3192000  | 2.5033888  | 0.3410680  |
| H | 2.5846658  | 2.5206268  | 1.3293819  |
| H | 4.0748167  | 0.5755350  | 1.1061039  |
| H | 0.9821499  | -2.5867728 | -1.6021209 |
| H | -1.4046469 | -1.4580039 | -2.1023888 |
| H | -1.4399199 | 0.8114569  | -1.0562609 |
| O | -3.0989908 | 1.6647229  | -0.5764050 |
| H | -3.8076807 | 1.6735819  | -1.2300179 |
| H | -3.0462308 | 2.5627648  | -0.2294530 |
| O | -0.8061629 | -1.8672649 | 1.6118129  |
| H | -0.1512040 | -1.3896339 | 2.1324608  |
| H | -0.4124880 | -1.9518669 | 0.7292369  |
| O | -3.2817107 | -0.4913250 | 1.3730759  |
| H | -3.1982908 | 0.2386330  | 0.7423249  |
| H | -2.4066688 | -0.9131709 | 1.4277489  |

-----  
La:

|   |            |            |            |
|---|------------|------------|------------|
| C | 2.4458908  | -1.1006529 | -0.4895610 |
| C | 1.0218369  | -1.0116459 | -0.3611330 |
| C | 0.3965640  | 0.2500210  | -0.3600240 |
| C | 1.0790089  | 1.4464919  | -0.4719430 |
| C | 2.5006528  | 1.3228549  | -0.7535729 |
| C | 3.1375668  | 0.1110500  | -0.7508969 |
| C | 0.0204890  | -1.9634099 | -0.1579570 |
| C | -1.2246399 | -1.2718249 | -0.0362840 |
| N | -0.9691549 | 0.0259080  | -0.1666910 |
| H | 2.9457968  | -2.0580558 | -0.5170220 |
| H | 0.5816150  | 2.4042468  | -0.4766740 |

|   |            |            |            |
|---|------------|------------|------------|
| H | 3.0655038  | 2.2237718  | -0.9534699 |
| H | 4.2030867  | 0.0777680  | -0.9390679 |
| H | 0.1365040  | -3.0323898 | -0.0879620 |
| H | -2.2280528 | -1.6344499 | 0.1152020  |
| H | -1.6858679 | 0.7524779  | -0.1250100 |
| O | -3.2513308 | 1.7696399  | -0.0182080 |
| H | -3.4672027 | 2.2978328  | -0.7959939 |
| H | -3.3289257 | 2.3633538  | 0.7382109  |
| O | 2.1435108  | 0.2876560  | 2.4720088  |
| H | 2.4633198  | -0.3563760 | 1.8202449  |
| H | 1.6948949  | 0.9438279  | 1.9194949  |
| O | -4.4953727 | -0.7998149 | 0.2079240  |
| H | -4.1922037 | 0.1191040  | 0.1199290  |
| H | -4.8430666 | -1.0396279 | -0.6566109 |

-----

**N. Water Cluster - Size 3b - CAM-B3LYP/def2TZVP Method Group**

s0:

|   |            |            |            |
|---|------------|------------|------------|
| C | -2.9041478 | -0.1134700 | 0.3053350  |
| C | -1.7770719 | 0.6837099  | 0.0825660  |
| C | -0.6085130 | 0.0848830  | -0.4326080 |
| C | -0.5388260 | -1.2738349 | -0.7280139 |
| C | -1.6660509 | -2.0327008 | -0.5009520 |
| C | -2.8392658 | -1.4575929 | 0.0120130  |
| C | -1.4803529 | 2.0741728  | 0.2636360  |
| C | -0.1912650 | 2.2574038  | -0.1321280 |
| N | 0.3524940  | 1.0614659  | -0.5353940 |
| H | -3.8134957 | 0.3199450  | 0.7018649  |
| H | 0.3687680  | -1.7155519 | -1.1176609 |



|   |            |            |            |
|---|------------|------------|------------|
| H | -1.6477509 | -3.0919098 | -0.7208999 |
| H | -3.7047517 | -2.0852508 | 0.1786420  |
| H | -2.1418138 | 2.8352188  | 0.6425780  |
| H | 0.4011190  | 3.1571058  | -0.1536390 |
| H | 1.2709069  | 0.9335449  | -0.9661889 |
| O | 2.8954368  | 0.3305870  | -1.5963009 |
| H | 3.5958407  | 0.9710899  | -1.7538689 |
| H | 3.2046858  | -0.2469090 | -0.8626609 |
| O | 1.5970589  | 0.0309860  | 2.1279798  |
| H | 1.0866299  | 0.4771680  | 1.4361249  |
| H | 0.9603299  | -0.4975320 | 2.6215648  |
| O | 3.4889277  | -1.2115479 | 0.5737210  |
| H | 3.3072557  | -2.1507618 | 0.4668640  |
| H | 2.8263848  | -0.8720419 | 1.2127619  |

-----  
La:

|   |            |            |            |
|---|------------|------------|------------|
| C | -2.8955188 | -0.1967430 | 0.3363510  |
| C | -1.7886929 | 0.7041049  | 0.2808810  |
| C | -0.6053350 | 0.3257480  | -0.3803260 |
| C | -0.4162780 | -0.9102369 | -0.9771959 |
| C | -1.5863299 | -1.7830909 | -0.9747219 |
| C | -2.7459988 | -1.4339019 | -0.3379460 |
| C | -1.5787509 | 1.9940998  | 0.7774429  |
| C | -0.2525360 | 2.3901058  | 0.4188640  |
| N | 0.2917560  | 1.3910379  | -0.2653220 |
| H | -3.8121577 | 0.0701390  | 0.8417289  |
| H | 0.4570250  | -1.1387749 | -1.5708129 |
| H | -1.5177439 | -2.7365898 | -1.4812299 |
| H | -3.5777077 | -2.1272778 | -0.3500220 |
| H | -2.2720658 | 2.6045668  | 1.3322749  |

|   |           |            |            |
|---|-----------|------------|------------|
| H | 0.2775710 | 3.3032157  | 0.6261520  |
| H | 1.2639349 | 1.3719289  | -0.6173060 |
| O | 2.9176588 | 1.1179279  | -1.1108589 |
| H | 3.5196267 | 1.8619189  | -1.0105479 |
| H | 3.2688108 | 0.3901310  | -0.5440970 |
| O | 1.2625409 | -1.7806189 | 1.4287409  |
| H | 0.6441280 | -1.5869039 | 0.6920619  |
| H | 1.1477429 | -2.7148578 | 1.6340339  |
| O | 3.6707767 | -0.9170269 | 0.4971630  |
| H | 4.1285067 | -1.6427159 | 0.0610530  |
| H | 2.8388678 | -1.2948189 | 0.8635169  |

-----

**O. Water Cluster - Size 6 - CAM-B3LYP/def2TZVP Method Group**

s0:

|   |            |            |            |
|---|------------|------------|------------|
| C | 1.7834599  | 1.6919739  | -1.1725539 |
| C | 1.0722509  | 0.5124050  | -0.9324249 |
| C | 0.4780530  | 0.3142600  | 0.3300030  |
| C | 0.5695920  | 1.2592639  | 1.3494249  |
| C | 1.2642029  | 2.4209458  | 1.0788419  |
| C | 1.8669949  | 2.6345938  | -0.1707770 |
| C | 0.7610239  | -0.6513660 | -1.7195139 |
| C | 0.0091410  | -1.4719429 | -0.9302239 |
| N | -0.1442350 | -0.9156259 | 0.3153600  |
| H | 2.2537898  | 1.8636309  | -2.1323678 |
| H | 0.1257760  | 1.0817499  | 2.3206238  |
| H | 1.3543619  | 3.1772348  | 1.8474399  |
| H | 2.4081238  | 3.5553797  | -0.3442040 |
| H | 1.0466279  | -0.8411499 | -2.7417688 |

|   |            |            |            |
|---|------------|------------|------------|
| H | -0.4472890 | -2.4200808 | -1.1606749 |
| H | -0.8828969 | -1.1682219 | 0.9681939  |
| O | -2.6126978 | -0.7164819 | 1.7564339  |
| H | -2.6803888 | 0.2292410  | 1.5194569  |
| H | -2.9174528 | -0.8042919 | 2.6651518  |
| O | 3.5878167  | -1.7384369 | -0.5165240 |
| H | 4.1898527  | -0.9865479 | -0.4927480 |
| H | 2.8396038  | -1.4496259 | -1.0589909 |
| O | -3.5809927 | -1.8507489 | -0.6888939 |
| H | -3.3634487 | -1.6145179 | 0.2266920  |
| H | -3.2377078 | -1.0996179 | -1.2060179 |
| O | 2.2660088  | -2.3800568 | 1.8746759  |
| H | 1.3913189  | -2.0493898 | 1.6414239  |
| H | 2.8087278  | -2.1768918 | 1.0903739  |
| O | -2.4601408 | 0.4698310  | -1.8791849 |
| H | -1.5369609 | 0.2551710  | -2.0668958 |
| H | -2.4405988 | 1.0370159  | -1.0868139 |
| O | -2.4559888 | 1.8204379  | 0.6094460  |
| H | -1.5857879 | 2.1948628  | 0.8094979  |
| H | -3.0963588 | 2.5282588  | 0.7498239  |

-----  
La:

|   |            |            |            |
|---|------------|------------|------------|
| C | 1.9438949  | -0.4065760 | -1.6595789 |
| C | 0.9061399  | -0.8018959 | -0.7600759 |
| C | 0.3405260  | 0.1291760  | 0.1237420  |
| C | 0.7160389  | 1.4652699  | 0.1872570  |
| C | 1.7517299  | 1.8538419  | -0.7556229 |
| C | 2.3175108  | 0.9646059  | -1.6276999 |
| C | 0.3006180  | -2.0367308 | -0.4918260 |
| C | -0.6579999 | -1.8342179 | 0.5465190  |

|   |            |            |            |
|---|------------|------------|------------|
| N | -0.6116420 | -0.5567640 | 0.8894049  |
| H | 2.3130838  | -1.0805739 | -2.4193308 |
| H | 0.3500800  | 2.1449588  | 0.9434449  |
| H | 2.0754748  | 2.8859738  | -0.7625329 |
| H | 3.0782508  | 1.3165819  | -2.3121738 |
| H | 0.5077400  | -2.9848498 | -0.9593009 |
| H | -1.3672279 | -2.5182818 | 0.9777959  |
| H | -1.2782729 | -0.0981180 | 1.5151399  |
| O | -2.8406808 | 0.9148839  | 1.7819989  |
| H | -2.7714048 | 1.5138389  | 1.0125119  |
| H | -3.0620778 | 1.4529969  | 2.5486908  |
| O | 4.0955147  | -1.1233239 | 0.4399440  |
| H | 3.4988447  | -0.9498979 | -0.3170930 |
| H | 4.0114007  | -2.0663128 | 0.6188960  |
| O | -4.0616417 | -1.3725129 | 0.5022650  |
| H | -3.8049377 | -0.6372990 | 1.0791169  |
| H | -3.6422887 | -1.1604739 | -0.3510200 |
| O | 2.9651238  | 0.5555940  | 2.3850338  |
| H | 2.2449468  | 0.9544859  | 1.8785989  |
| H | 3.3930927  | -0.0545220 | 1.7545249  |
| O | -2.8027848 | -0.4351090 | -1.8640859 |
| H | -1.9827278 | -0.8362199 | -2.1703488 |
| H | -2.5685558 | 0.4649080  | -1.5683209 |
| O | -2.1937058 | 2.0338938  | -0.6725629 |
| H | -1.2220989 | 2.1007178  | -0.5872560 |
| H | -2.4971828 | 2.8611808  | -1.0642139 |

-----

**P. Water Cluster - Size 9 - CAM-B3LYP/def2TZVP Method Group**

s0:

|   |            |            |            |
|---|------------|------------|------------|
| C | -2.6695188 | -2.0748188 | -0.0239450 |
| C | -1.7223579 | -1.3519279 | -0.7560219 |
| C | -0.6352040 | -0.7575649 | -0.0738440 |
| C | -0.4757030 | -0.8670639 | 1.3069809  |
| C | -1.4207069 | -1.5945729 | 1.9996618  |
| C | -2.5087278 | -2.1954668 | 1.3416519  |
| C | -1.5721029 | -1.0153099 | -2.1415958 |
| C | -0.4306950 | -0.2723600 | -2.2419898 |
| N | 0.1291330  | -0.1047440 | -1.0045169 |
| H | -3.5136617 | -2.5352308 | -0.5213860 |
| H | 0.3398710  | -0.3734350 | 1.8190709  |
| H | -1.3286339 | -1.7001009 | 3.0726448  |
| H | -3.2281488 | -2.7616078 | 1.9188329  |
| H | -2.2133108 | -1.3099019 | -2.9558758 |
| H | 0.0355790  | 0.1590110  | -3.1127208 |
| H | 1.0264409  | 0.3417500  | -0.8349519 |
| O | 2.9501538  | 0.7911379  | -0.9006029 |
| H | 3.2775937  | 0.4158700  | -0.0594220 |
| H | 3.0473738  | 0.0646860  | -1.5515079 |
| O | -2.7458988 | 1.8849489  | -1.1209819 |
| H | -3.0960118 | 1.5393069  | -0.2718850 |
| H | -2.4435548 | 1.1078809  | -1.6124789 |
| O | 3.0021828  | -1.6159609 | -2.2215778 |
| H | 2.3436308  | -1.8124229 | -2.8954138 |
| H | 2.6989578  | -2.0651728 | -1.4006479 |
| O | -0.7609879 | 3.6712307  | -0.7409389 |
| H | -0.7482819 | 4.2441777  | -1.5135049 |
| H | -1.4817679 | 3.0137998  | -0.8920279 |

|   |            |            |            |
|---|------------|------------|------------|
| O | 2.3209598  | -2.5520048 | 0.2618590  |
| H | 1.3788269  | -2.6110478 | 0.4574420  |
| H | 2.6656478  | -1.8398579 | 0.8406159  |
| O | 3.3671907  | -0.3710070 | 1.5888489  |
| H | 2.8038908  | 0.2837490  | 2.0786758  |
| H | 4.2034057  | -0.4438860 | 2.0603928  |
| O | -3.6806347 | 0.9017859  | 1.2704879  |
| H | -3.3394287 | 1.3554729  | 2.0490428  |
| H | -3.4091017 | -0.0227500 | 1.3708949  |
| O | 1.6212009  | 2.9238388  | 0.3054590  |
| H | 0.7602859  | 3.1725688  | -0.1010030 |
| H | 2.0760758  | 2.3356458  | -0.3220050 |
| O | 1.7134889  | 1.4723079  | 2.5407158  |
| H | 1.6211029  | 2.0889938  | 1.7681179  |
| H | 1.9281409  | 2.0099928  | 3.3091747  |

-----  
La:

|   |            |            |            |
|---|------------|------------|------------|
| C | -2.7031708 | -2.1484148 | 0.0109230  |
| C | -1.6938009 | -1.5288899 | -0.7899269 |
| C | -0.5954390 | -0.8972619 | -0.1727620 |
| C | -0.4035900 | -0.8466999 | 1.1939479  |
| C | -1.4662429 | -1.4477939 | 1.9932558  |
| C | -2.5463628 | -2.0648118 | 1.4128529  |
| C | -1.5246349 | -1.3836139 | -2.1724768 |
| C | -0.3114030 | -0.6619609 | -2.3896238 |
| N | 0.2065580  | -0.3870730 | -1.1963609 |
| H | -3.5526357 | -2.6411738 | -0.4384670 |
| H | 0.3640290  | -0.2418530 | 1.6515659  |
| H | -1.3723469 | -1.4337279 | 3.0711398  |
| H | -3.2972797 | -2.5129488 | 2.0512088  |

|   |            |            |            |
|---|------------|------------|------------|
| H | -2.1759438 | -1.7392059 | -2.9537988 |
| H | 0.1604940  | -0.3574470 | -3.3070607 |
| H | 1.1080819  | 0.0869110  | -1.0532399 |
| O | 2.8404228  | 0.6632719  | -0.9674079 |
| H | 3.1277878  | 0.6000090  | -0.0333960 |
| H | 3.1736148  | -0.1609960 | -1.3829879 |
| O | -3.0435788 | 1.5094709  | -0.8597799 |
| H | -3.0789208 | 1.4550309  | 0.1209500  |
| H | -2.8992818 | 0.6016980  | -1.1535799 |
| O | 3.3541917  | -1.9335379 | -1.6046419 |
| H | 4.2301357  | -2.3133668 | -1.7243829 |
| H | 3.0637028  | -2.1763158 | -0.6963199 |
| O | -1.0240119 | 3.0792888  | -1.7430429 |
| H | -1.3867899 | 3.9552707  | -1.9060159 |
| H | -1.7687309 | 2.5232258  | -1.4136229 |
| O | 2.4804258  | -2.2284448 | 0.9788939  |
| H | 1.5134039  | -2.1632468 | 1.0463859  |
| H | 2.8017348  | -1.3940489 | 1.3744599  |
| O | 3.2704208  | 0.3400990  | 1.7515799  |
| H | 2.6011728  | 1.0109979  | 2.0458628  |
| H | 4.0986287  | 0.5412520  | 2.1989618  |
| O | -3.0955828 | 1.2391769  | 1.8673639  |
| H | -2.4430928 | 1.7969389  | 2.3056908  |
| H | -2.7843878 | 0.3254250  | 2.0029778  |
| O | 1.3102229  | 2.9704078  | -0.3751290 |
| H | 0.4561170  | 3.0130098  | -0.8626419 |
| H | 1.8612439  | 2.3130938  | -0.8288559 |
| O | 1.3406169  | 2.1260878  | 2.1673838  |
| H | 1.2622929  | 2.5067218  | 1.2553479  |
| H | 1.4939179  | 2.8643588  | 2.7654578  |

-----  
**Q. Water Cluster - Size 12 - CAM-B3LYP/def2TZVP Method Group**

s0:

|   |            |            |            |
|---|------------|------------|------------|
| C | 1.2518009  | -0.1828560 | 0.6946149  |
| C | 0.3787180  | -1.0254669 | 0.0013720  |
| C | -0.8706119 | -1.3488109 | 0.5794530  |
| C | -1.2703239 | -0.8385539 | 1.8161089  |
| C | -0.3897950 | -0.0090980 | 2.4785138  |
| C | 0.8629019  | 0.3151420  | 1.9243149  |
| C | 0.4339930  | -1.7084719 | -1.2580269 |
| C | -0.7452509 | -2.3895668 | -1.3841909 |
| N | -1.5296859 | -2.1813558 | -0.2830490 |
| H | 2.2086828  | 0.0892650  | 0.2683210  |
| H | -2.2287358 | -1.0997009 | 2.2456428  |
| H | -0.6635869 | 0.3991480  | 3.4420787  |
| H | 1.5335639  | 0.9595189  | 2.4797478  |
| H | 1.2488609  | -1.6996499 | -1.9630779 |
| H | -1.0910099 | -3.0194918 | -2.1875968 |
| H | -2.5036568 | -2.4852038 | -0.1750080 |
| O | -4.9694396 | -0.0194350 | -0.4581740 |
| H | -4.1732997 | 0.5486610  | -0.3936630 |
| H | -5.6461516 | 0.4023110  | 0.0806970  |
| O | 2.5945518  | -3.5988287 | 0.1584070  |
| H | 2.4734028  | -3.3045087 | 1.0863589  |
| H | 1.7226799  | -3.5014007 | -0.2452290 |
| O | -4.2801517 | -2.5854088 | 0.0984080  |
| H | -4.8187756 | -3.1998468 | -0.4093000 |
| H | -4.6142056 | -1.6820409 | -0.1064120 |
| O | 2.2003148  | -2.6415408 | 2.7077048  |



|   |            |            |            |
|---|------------|------------|------------|
| H | 1.6276969  | -3.1275068 | 3.3110307  |
| H | 1.8089039  | -1.7606799 | 2.6232148  |
| O | 4.0360407  | -1.8879329 | -1.4269799 |
| H | 4.1746997  | -2.3749968 | -2.2449238 |
| H | 3.5563947  | -2.5006368 | -0.8259719 |
| O | 3.7443467  | 0.8923309  | -1.6299469 |
| H | 3.7259517  | -0.0802060 | -1.5909429 |
| H | 2.8479978  | 1.2045679  | -1.8581889 |
| O | 2.6350738  | 4.8414596  | 1.3858289  |
| H | 2.4588268  | 4.9209696  | 2.3276798  |
| H | 1.9144829  | 4.2845657  | 1.0363169  |
| O | -1.1028879 | 0.7935029  | -2.5644358 |
| H | -0.8212619 | -0.1222230 | -2.4289778 |
| H | -1.6610939 | 0.9984589  | -1.7883059 |
| O | 0.6195570  | 3.1970698  | 0.3685050  |
| H | 0.5825560  | 2.3650698  | 0.8611349  |
| H | -0.2914970 | 3.5513057  | 0.3650440  |
| O | -2.5891588 | 1.3499069  | -0.2441810 |
| H | -2.1305808 | 0.9047659  | 0.4831880  |
| H | -2.5159608 | 2.3092088  | -0.0604200 |
| O | 1.3028929  | 2.1488728  | -2.1622748 |
| H | 1.1111429  | 2.5979768  | -1.3189859 |
| H | 0.4731770  | 1.6766609  | -2.3771468 |
| O | -2.0471528 | 4.0209477  | 0.2328030  |
| H | -2.4304198 | 4.4399307  | 1.0134469  |
| H | -2.2314738 | 4.6137426  | -0.5066920 |

-----

La:

|   |           |            |           |
|---|-----------|------------|-----------|
| C | 1.0910279 | 0.1101680  | 1.4007489 |
| C | 0.5034470 | -0.7114809 | 0.3898970 |

|   |            |            |            |
|---|------------|------------|------------|
| C | -0.7436519 | -1.3108439 | 0.6057830  |
| C | -1.5222269 | -1.1029899 | 1.7391709  |
| C | -0.8959599 | -0.2990670 | 2.7688578  |
| C | 0.3331000  | 0.2813860  | 2.5986988  |
| C | 0.9384029  | -1.1195199 | -0.8829789 |
| C | -0.0758560 | -1.9638309 | -1.4334339 |
| N | -1.0499199 | -2.0623288 | -0.5406680 |
| H | 2.0182908  | 0.6397010  | 1.2291919  |
| H | -2.4445858 | -1.6356769 | 1.9177049  |
| H | -1.4299539 | -0.1486210 | 3.6981197  |
| H | 0.7450639  | 0.8844269  | 3.3979487  |
| H | 1.8628199  | -0.8659799 | -1.3750669 |
| H | -0.1141470 | -2.4612458 | -2.3876528 |
| H | -1.9603189 | -2.5418648 | -0.6857259 |
| O | -5.0287076 | -0.7334329 | -0.6892809 |
| H | -4.4050047 | -0.0260140 | -0.4192970 |
| H | -5.7740176 | -0.6862699 | -0.0821830 |
| O | 3.7176837  | -2.9846778 | -0.1093490 |
| H | 3.3728467  | -2.7839288 | 0.7907369  |
| H | 3.0662728  | -3.5627067 | -0.5199110 |
| O | -3.6000997 | -3.0251208 | -0.7827609 |
| H | -3.8963357 | -3.5835597 | -1.5081429 |
| H | -4.1891457 | -2.2333118 | -0.7705259 |
| O | 2.7890638  | -2.2557508 | 2.3349778  |
| H | 2.2201968  | -2.8566728 | 2.8285368  |
| H | 2.2478328  | -1.4584519 | 2.1620148  |
| O | 4.2349437  | -0.7747719 | -1.5956189 |
| H | 4.6170276  | -1.0746239 | -2.4258448 |
| H | 4.0747937  | -1.5808819 | -1.0525399 |
| O | 3.2489858  | 1.8149089  | -1.5518529 |
| H | 3.5599417  | 0.8901549  | -1.5389039 |

|   |            |            |            |
|---|------------|------------|------------|
| H | 2.3208318  | 1.8155409  | -1.8665819 |
| O | 2.9650468  | 3.4314097  | 0.6857889  |
| H | 3.1487798  | 2.8375248  | -0.0705390 |
| H | 1.9978968  | 3.4593547  | 0.7361539  |
| O | -1.7347219 | 0.8212419  | -2.4744558 |
| H | -1.7686639 | -0.0911070 | -2.7790418 |
| H | -2.1888378 | 0.8371629  | -1.6057149 |
| O | 0.1322940  | 2.9332218  | 0.5430950  |
| H | 0.2357340  | 2.0462138  | 0.9310399  |
| H | -0.7732159 | 3.2250168  | 0.7573869  |
| O | -2.9837088 | 0.9423729  | -0.0015310 |
| H | -2.5142878 | 0.3902650  | 0.6577919  |
| H | -2.9629418 | 1.8581409  | 0.3416210  |
| O | 0.6064740  | 2.2580108  | -2.1148988 |
| H | 0.3954120  | 2.5854548  | -1.2185689 |
| H | -0.1424920 | 1.6709299  | -2.3384558 |
| O | -2.5882798 | 3.5256877  | 0.9560139  |
| H | -2.8874428 | 3.7155267  | 1.8537469  |
| H | -2.9244218 | 4.2440747  | 0.4058940  |

-----

### **R. Water Cluster - Size 15 - CAM-B3LYP/def2TZVP Method Group**

s0:

|   |            |            |            |
|---|------------|------------|------------|
| C | -0.6117980 | 0.6206560  | -0.5071840 |
| C | -0.1226770 | -0.3822240 | 0.3498860  |
| C | 0.8915609  | -1.2601559 | -0.1221070 |
| C | 1.4174249  | -1.1665399 | -1.4142819 |
| C | 0.8989079  | -0.1816520 | -2.2498568 |
| C | -0.1090960 | 0.7026779  | -1.7989339 |

|   |            |            |            |
|---|------------|------------|------------|
| C | -0.3812170 | -0.7550749 | 1.7191039  |
| C | 0.4572010  | -1.8039089 | 2.0124818  |
| N | 1.2175269  | -2.1296798 | 0.9026339  |
| H | -1.3442929 | 1.3395359  | -0.1628870 |
| H | 2.2198458  | -1.8195189 | -1.7320109 |
| H | 1.2895099  | -0.0738190 | -3.2547948 |
| H | -0.4556510 | 1.4964679  | -2.4482798 |
| H | -1.1011169 | -0.3048440 | 2.3834068  |
| H | 0.5656380  | -2.3540458 | 2.9333088  |
| H | 2.0466428  | -2.7670618 | 0.8474539  |
| O | 4.6656776  | 0.8377719  | 0.4133370  |
| H | 3.8283527  | 1.3683909  | 0.2259470  |
| H | 5.0460986  | 1.0420009  | 1.2808279  |
| O | -1.2499739 | -3.6929527 | -0.1065710 |
| H | -1.4127389 | -3.1914208 | -0.9792349 |
| H | -0.3447000 | -3.5391577 | 0.2185040  |
| O | 4.8198936  | -1.5153839 | -0.5332910 |
| H | 5.1083456  | -1.5168209 | -1.4578999 |
| H | 4.7681536  | -0.5730240 | -0.1465210 |
| O | -1.7418739 | -2.3091638 | -2.1940418 |
| H | -1.0845619 | -1.6651509 | -2.5063168 |
| H | -2.6956598 | -1.9995868 | -2.3288078 |
| O | -3.3154997 | -0.8398709 | 0.2436190  |
| H | -3.3417297 | -1.6792399 | 0.8507559  |
| H | -2.4170268 | -0.7937459 | -0.1425650 |
| O | -3.3695017 | 1.6138459  | 1.3081069  |
| H | -3.4347117 | 0.6805529  | 0.9686509  |
| H | -2.5936468 | 1.7605819  | 1.9034259  |
| O | -0.7629709 | 4.0623867  | -1.7430969 |
| H | -1.1778399 | 4.1115617  | -2.6154808 |
| H | -1.4220569 | 3.9080847  | -0.9675069 |

|   |            |            |            |
|---|------------|------------|------------|
| O | 1.2267059  | 1.8126629  | 2.2278548  |
| H | 1.1821449  | 0.8704969  | 2.4731618  |
| H | 1.6948029  | 1.9067199  | 1.3386319  |
| O | -2.2260078 | 3.6977767  | 0.2687540  |
| H | -2.8964228 | 2.9637348  | 0.3620540  |
| H | -1.6714879 | 3.5915117  | 1.0914419  |
| O | 2.3860488  | 1.9233639  | -0.1176700 |
| H | 1.9905768  | 1.2000219  | -0.6411000 |
| H | 2.1611338  | 2.8422468  | -0.5873740 |
| O | -1.1408799 | 2.7170448  | 2.4604488  |
| H | -1.2872099 | 3.1331588  | 3.3262947  |
| H | -0.1745280 | 2.3806358  | 2.3657378  |
| O | 1.6816139  | 3.9921227  | -1.2580479 |
| H | 0.6795659  | 4.0486487  | -1.5017709 |
| H | 2.1174938  | 4.8533666  | -1.1937329 |
| O | 3.4572117  | -3.4307947 | 0.4250440  |
| H | 4.0538207  | -2.7000338 | 0.0330820  |
| H | 3.5172937  | -4.2598137 | -0.0742740 |
| O | -3.0738218 | -2.9976598 | 1.5027969  |
| H | -2.3266538 | -3.3939067 | 0.9169819  |
| H | -2.8498778 | -3.0131208 | 2.4463528  |
| O | -4.1519177 | -1.4326189 | -2.1432238 |
| H | -4.0946137 | -1.1360149 | -1.1863889 |
| H | -4.9450416 | -1.9605449 | -2.3243098 |

-----

La:

|   |            |            |            |
|---|------------|------------|------------|
| C | -0.8119069 | 0.2200740  | -0.3921170 |
| C | 0.0975580  | -0.3083720 | 0.5754950  |
| C | 1.2665529  | -0.9708579 | 0.1769620  |
| C | 1.6251329  | -1.2096449 | -1.1575359 |

|   |            |            |            |
|---|------------|------------|------------|
| C | 0.7494059  | -0.5914300 | -2.1324738 |
| C | -0.3994990 | 0.0863560  | -1.7684969 |
| C | 0.0801130  | -0.3329700 | 2.0035708  |
| C | 1.2675699  | -1.0084899 | 2.4384868  |
| N | 1.9536049  | -1.3709789 | 1.3498049  |
| H | -1.5562639 | 0.9593039  | -0.1194130 |
| H | 2.5906808  | -1.6117169 | -1.4285239 |
| H | 1.0229209  | -0.6524080 | -3.1804288 |
| H | -0.9951419 | 0.5770160  | -2.5312278 |
| H | -0.6664199 | 0.0951360  | 2.6514478  |
| H | 1.6184049  | -1.1955389 | 3.4388947  |
| H | 2.9258058  | -1.8187429 | 1.2963999  |
| O | 4.1197917  | 1.8492479  | -0.4453250 |
| H | 3.1507298  | 2.0995648  | -0.5775420 |
| H | 4.6031006  | 2.5024818  | 0.0814920  |
| O | -0.2138750 | -3.6680877 | -0.7583059 |
| H | -0.9055259 | -3.4183437 | -1.4626979 |
| H | 0.5794640  | -3.1044398 | -0.8925939 |
| O | 5.0697936  | -0.4723220 | -0.7460409 |
| H | 5.2426756  | -0.6905309 | -1.6738359 |
| H | 4.6816556  | 0.4680490  | -0.6338150 |
| O | -1.9109679 | -2.7839418 | -2.4788248 |
| H | -1.5535779 | -1.9054439 | -2.7035888 |
| H | -2.8570018 | -2.7185598 | -2.1166478 |
| O | -2.8537358 | -1.5192379 | 0.6735549  |
| H | -2.3181188 | -2.2664578 | 1.1381439  |
| H | -2.2016368 | -1.0032229 | 0.1088650  |
| O | -3.5424177 | 0.7809419  | 1.8296579  |
| H | -3.3637797 | -0.1475940 | 1.5153519  |
| H | -2.7560408 | 1.1922799  | 2.2630198  |
| O | -2.0985898 | 3.2507388  | -1.9153109 |

|   |            |            |            |
|---|------------|------------|------------|
| H | -2.5468148 | 2.8269638  | -2.6608398 |
| H | -2.5498208 | 3.0776208  | -1.0082949 |
| O | 0.9340749  | 2.5983058  | 1.7858379  |
| H | 1.6174519  | 2.2639438  | 2.3868778  |
| H | 1.1961159  | 2.4792268  | 0.8157999  |
| O | -3.0853448 | 2.8889638  | 0.3781070  |
| H | -3.5309317 | 2.0439858  | 0.6739439  |
| H | -2.4203348 | 3.0469108  | 1.1023909  |
| O | 1.5946279  | 2.3196858  | -0.7139099 |
| H | 1.2285599  | 1.4747199  | -1.0469019 |
| H | 1.1287909  | 3.1056678  | -1.2370439 |
| O | -1.5031129 | 2.5224448  | 2.4738198  |
| H | -1.6525509 | 3.0165638  | 3.2975177  |
| H | -0.5087590 | 2.5322158  | 2.2114338  |
| O | 0.2783230  | 4.0118457  | -1.9380509 |
| H | -0.7154449 | 3.7334947  | -1.9765308 |
| H | 0.4186220  | 4.9690736  | -1.9557789 |
| O | 4.3322477  | -2.2266728 | 0.9012379  |
| H | 4.7063546  | -1.5542219 | 0.2190980  |
| H | 4.5920956  | -3.1419338 | 0.7184469  |
| O | -1.3232719 | -3.3509337 | 1.4966179  |
| H | -0.8047099 | -3.5560017 | 0.6310280  |
| H | -0.7511959 | -3.2839027 | 2.2767708  |
| O | -4.1690617 | -2.5368988 | -1.2887149 |
| H | -3.8188117 | -2.1453348 | -0.4229380 |
| H | -4.7831796 | -3.2735928 | -1.1450509 |

-----

**S. Water Cluster - Size 3a - CAM-B3LYP/aug-cc-pVXZ Method Group**

s0:

|   |            |            |            |
|---|------------|------------|------------|
| C | 2.7867428  | -1.0226889 | -0.1787650 |
| C | 1.3895019  | -1.0040839 | -0.2078750 |
| C | 0.7254479  | 0.2346930  | -0.3208750 |
| C | 1.4142839  | 1.4402229  | -0.4102600 |
| C | 2.7911028  | 1.3898629  | -0.3836470 |
| C | 3.4719997  | 0.1687890  | -0.2673730 |
| C | 0.3731160  | -2.0132558 | -0.1449920 |
| C | -0.8252929 | -1.3752239 | -0.2166800 |
| N | -0.6262540 | -0.0159230 | -0.2995600 |
| H | 3.3210307  | -1.9587379 | -0.0892190 |
| H | 0.8885359  | 2.3807978  | -0.4960320 |
| H | 3.3578757  | 2.3076508  | -0.4522950 |
| H | 4.5527727  | 0.1681690  | -0.2473170 |
| H | 0.5199060  | -3.0755048 | -0.0528860 |
| H | -1.8284009 | -1.7666689 | -0.2071220 |
| H | -1.3603239 | 0.6605979  | -0.4747860 |
| O | -3.0035458 | 1.6594539  | -0.7041609 |
| H | -3.1393458 | 2.0856478  | -1.5570279 |
| H | -3.1857548 | 2.3335448  | -0.0408380 |
| O | -0.6081760 | 0.4744180  | 2.8264928  |
| H | -0.6498270 | 0.3026260  | 1.8773889  |
| H | 0.2990760  | 0.7482039  | 2.9886778  |
| O | -4.1570017 | -0.8993379 | -0.3259800 |
| H | -3.8868837 | 0.0238430  | -0.4610920 |
| H | -5.1164996 | -0.8848659 | -0.2785380 |

-----

La:



|   |            |            |            |
|---|------------|------------|------------|
| C | 2.4682378  | -1.0774029 | -0.4814080 |
| C | 1.0396089  | -1.0041339 | -0.3933230 |
| C | 0.4026170  | 0.2516850  | -0.3814560 |
| C | 1.0765499  | 1.4544169  | -0.4450870 |
| C | 2.5034798  | 1.3491469  | -0.6979359 |
| C | 3.1528908  | 0.1430260  | -0.7024489 |
| C | 0.0459420  | -1.9682778 | -0.2313230 |
| C | -1.2072049 | -1.2910779 | -0.1240450 |
| N | -0.9655809 | 0.0114390  | -0.2266130 |
| H | 2.9767078  | -2.0289748 | -0.5161290 |
| H | 0.5712180  | 2.4069848  | -0.4447080 |
| H | 3.0640168  | 2.2577498  | -0.8668199 |
| H | 4.2218537  | 0.1242970  | -0.8646739 |
| H | 0.1699270  | -3.0362648 | -0.1780420 |
| H | -2.2077908 | -1.6707789 | -0.0081790 |
| H | -1.6884559 | 0.7301169  | -0.1846900 |
| O | -3.2444728 | 1.7604989  | -0.0649100 |
| H | -3.4710437 | 2.2768698  | -0.8459189 |
| H | -3.3033677 | 2.3681098  | 0.6803499  |
| O | 2.0523768  | 0.2427140  | 2.5237908  |
| H | 2.4010058  | -0.3848820 | 1.8722819  |
| H | 1.6089599  | 0.9033239  | 1.9738438  |
| O | -4.4308677 | -0.8040199 | 0.2538570  |
| H | -4.1814297 | 0.1257270  | 0.1298200  |
| H | -5.3115466 | -0.8901909 | -0.1205820 |

-----

**T. Water Cluster - Size 3b - CAM-B3LYP/aug-cc-pVXZ Method Group**

s0:

|   |            |            |            |
|---|------------|------------|------------|
| C | -2.9834248 | 0.0727160  | 0.3776710  |
| C | -1.7900679 | 0.7447989  | 0.0975060  |
| C | -0.7006289 | 0.0151990  | -0.4213360 |
| C | -0.7745299 | -1.3523649 | -0.6688939 |
| C | -1.9647038 | -1.9866118 | -0.3872410 |
| C | -3.0599728 | -1.2804179 | 0.1331420  |
| C | -1.3552169 | 2.1054098  | 0.2149760  |
| C | -0.0668170 | 2.1470988  | -0.2186600 |
| N | 0.3491050  | 0.8883349  | -0.5845300 |
| H | -3.8333757 | 0.6077910  | 0.7788579  |
| H | 0.0711580  | -1.8953079 | -1.0666929 |
| H | -2.0573948 | -3.0480608 | -0.5690650 |
| H | -3.9773237 | -1.8119849 | 0.3438390  |
| H | -1.9279769 | 2.9404498  | 0.5796530  |
| H | 0.6083320  | 2.9823768  | -0.2914530 |
| H | 1.2336969  | 0.6669959  | -1.0444329 |
| O | 2.8364968  | 0.0465130  | -1.7049859 |
| H | 3.4459347  | 0.6562829  | -2.1292688 |
| H | 3.3052247  | -0.3183760 | -0.9231059 |
| O | 1.7200179  | -0.0022210 | 2.0577618  |
| H | 1.1558939  | 0.3302910  | 1.3452359  |
| H | 1.1702149  | -0.6060550 | 2.5665218  |
| O | 3.8695517  | -0.9145459 | 0.6249080  |
| H | 3.9954727  | -1.8653079 | 0.6897779  |
| H | 3.1300438  | -0.6903819 | 1.2273809  |

-----  
La:

|   |            |            |            |
|---|------------|------------|------------|
| C | -2.9066588 | -0.1826760 | 0.3521460  |
| C | -1.7920919 | 0.7108989  | 0.2864930  |
| C | -0.6160170 | 0.3205570  | -0.3817380 |

|   |            |            |            |
|---|------------|------------|------------|
| C | -0.4443330 | -0.9150639 | -0.9790549 |
| C | -1.6226239 | -1.7742149 | -0.9741099 |
| C | -2.7753978 | -1.4158629 | -0.3283450 |
| C | -1.5669859 | 1.9930698  | 0.7873609  |
| C | -0.2382190 | 2.3760588  | 0.4247850  |
| N | 0.2932340  | 1.3762479  | -0.2684040 |
| H | -3.8171847 | 0.0934990  | 0.8616959  |
| H | 0.4267640  | -1.1571079 | -1.5686659 |
| H | -1.5680299 | -2.7249538 | -1.4851579 |
| H | -3.6127557 | -2.1006068 | -0.3375400 |
| H | -2.2484598 | 2.6073218  | 1.3506859  |
| H | 0.2997460  | 3.2842267  | 0.6297040  |
| H | 1.2608249  | 1.3521529  | -0.6260230 |
| O | 2.9179378  | 1.1027989  | -1.1354439 |
| H | 3.5211627  | 1.8481449  | -1.0705809 |
| H | 3.2834637  | 0.3926680  | -0.5590530 |
| O | 1.2926189  | -1.7936109 | 1.4093589  |
| H | 0.6590489  | -1.6046359 | 0.6876809  |
| H | 1.1750309  | -2.7228698 | 1.6298299  |
| O | 3.6978227  | -0.8933329 | 0.5102980  |
| H | 4.2053007  | -1.6080729 | 0.1158780  |
| H | 2.8693888  | -1.2969369 | 0.8514409  |

-----

**U. Water Cluster - Size 6 - CAM-B3LYP/aug-cc-pVXZ Method Group**

s0:

|   |           |           |            |
|---|-----------|-----------|------------|
| C | 1.7327079 | 1.8216589 | -1.1461129 |
| C | 1.0577089 | 0.6057210 | -0.9470969 |
| C | 0.4917480 | 0.3298320 | 0.3195230  |

|   |            |            |            |
|---|------------|------------|------------|
| C | 0.5812150  | 1.2284659  | 1.3891499  |
| C | 1.2404909  | 2.4271828  | 1.1604649  |
| C | 1.8121789  | 2.7203848  | -0.0955640 |
| C | 0.7620349  | -0.5307670 | -1.7872029 |
| C | 0.0461270  | -1.4142869 | -1.0153349 |
| N | -0.1008270 | -0.9147239 | 0.2560210  |
| H | 2.1806258  | 2.0544308  | -2.1112008 |
| H | 0.1625330  | 0.9902739  | 2.3657148  |
| H | 1.3285969  | 3.1516218  | 1.9688288  |
| H | 2.3263838  | 3.6702877  | -0.2352100 |
| H | 1.0326759  | -0.6657389 | -2.8289338 |
| H | -0.3838210 | -2.3733878 | -1.2804179 |
| H | -0.7960799 | -1.2374869 | 0.9264849  |
| O | -2.5414448 | -0.8678599 | 1.7696489  |
| H | -2.6252718 | 0.0870460  | 1.5769719  |
| H | -2.8799258 | -0.9990149 | 2.6622008  |
| O | 3.4802747  | -1.8216739 | -0.6291890 |
| H | 4.1180757  | -1.0974999 | -0.6295380 |
| H | 2.7071368  | -1.4750329 | -1.1028529 |
| O | -3.6217107 | -1.8067029 | -0.7262999 |
| H | -3.3498907 | -1.6348479 | 0.1908510  |
| H | -3.2601718 | -1.0434599 | -1.2158879 |
| O | 2.3829348  | -2.4547898 | 1.8676509  |
| H | 1.4842989  | -2.1244538 | 1.7519879  |
| H | 2.8236518  | -2.2378258 | 1.0225179  |
| O | -2.4648638 | 0.5248510  | -1.8581989 |
| H | -1.5420009 | 0.2852760  | -2.0265178 |
| H | -2.4468298 | 1.0362459  | -1.0275219 |
| O | -2.4614018 | 1.7216189  | 0.7163639  |
| H | -1.5972999 | 2.1132608  | 0.9139349  |
| H | -3.1124648 | 2.4106608  | 0.8996809  |

-----  
La:

|   |            |            |            |
|---|------------|------------|------------|
| C | 2.0357938  | -0.4091570 | -1.6609099 |
| C | 0.9640529  | -0.8109199 | -0.7922119 |
| C | 0.3664050  | 0.1180540  | 0.0827500  |
| C | 0.7399169  | 1.4605689  | 0.1682370  |
| C | 1.7970239  | 1.8609649  | -0.7544919 |
| C | 2.3967948  | 0.9719309  | -1.6185099 |
| C | 0.3444920  | -2.0519448 | -0.5569840 |
| C | -0.6535400 | -1.8540659 | 0.4549860  |
| N | -0.6158150 | -0.5741610 | 0.8128039  |
| H | 2.4251408  | -1.0816089 | -2.4224488 |
| H | 0.3483060  | 2.1414088  | 0.9207729  |
| H | 2.1142318  | 2.9028528  | -0.7543739 |
| H | 3.1757398  | 1.3358089  | -2.2879158 |
| H | 0.5648110  | -3.0027368 | -1.0302089 |
| H | -1.3744339 | -2.5477538 | 0.8702129  |
| H | -1.2914059 | -0.1203090 | 1.4396739  |
| O | -2.7822298 | 0.9182389  | 1.8015159  |
| H | -2.7285408 | 1.5214069  | 1.0328999  |
| H | -2.9530468 | 1.4642809  | 2.5769978  |
| O | 4.1243797  | -1.1041039 | 0.4890850  |
| H | 3.5382857  | -0.9471029 | -0.2821740 |
| H | 4.0809357  | -2.0556298 | 0.6437170  |
| O | -4.1228537 | -1.3364909 | 0.6059700  |
| H | -3.8138247 | -0.6080120 | 1.1682799  |
| H | -3.7693537 | -1.1093469 | -0.2753030 |
| O | 2.9197648  | 0.5236910  | 2.4212338  |
| H | 2.2120238  | 0.9231009  | 1.8946159  |
| H | 3.3698447  | -0.0756360 | 1.7927409  |

|   |            |            |            |
|---|------------|------------|------------|
| O | -3.0589238 | -0.3855200 | -1.8304019 |
| H | -2.3185538 | -0.8426599 | -2.2457498 |
| H | -2.7053818 | 0.4770290  | -1.5367029 |
| O | -2.1836728 | 2.0119258  | -0.6701519 |
| H | -1.2085869 | 2.0622908  | -0.6116830 |
| H | -2.4728318 | 2.8472278  | -1.0581619 |

-----

### V. Water Cluster - Size 9 - CAM-B3LYP/aug-cc-pVXZ Method Group

s0:

|   |            |            |            |
|---|------------|------------|------------|
| C | -2.6465258 | -2.1337008 | -0.0187380 |
| C | -1.7215729 | -1.3917389 | -0.7719089 |
| C | -0.6134560 | -0.7966229 | -0.1145370 |
| C | -0.4119050 | -0.9186849 | 1.2653719  |
| C | -1.3359049 | -1.6637579 | 1.9821768  |
| C | -2.4446038 | -2.2670588 | 1.3474389  |
| C | -1.6126129 | -1.0416879 | -2.1638048 |
| C | -0.4716250 | -0.2862630 | -2.2875788 |
| N | 0.1235050  | -0.1297790 | -1.0626219 |
| H | -3.5075997 | -2.5962998 | -0.4991900 |
| H | 0.4201400  | -0.4253270 | 1.7629819  |
| H | -1.2106509 | -1.7789939 | 3.0578668  |
| H | -3.1481188 | -2.8462178 | 1.9438269  |
| H | -2.2781388 | -1.3335159 | -2.9685598 |
| H | -0.0291230 | 0.1584320  | -3.1721768 |
| H | 1.0223029  | 0.3268770  | -0.9080299 |
| O | 2.8960608  | 0.8680309  | -0.8708319 |
| H | 3.1926858  | 0.5099410  | -0.0101920 |
| H | 3.0839838  | 0.1454160  | -1.5080209 |

|   |            |            |            |
|---|------------|------------|------------|
| O | -2.8456838 | 1.7874119  | -1.1079669 |
| H | -3.0985078 | 1.4538839  | -0.2195260 |
| H | -2.5264048 | 1.0088459  | -1.5899979 |
| O | 3.0977248  | -1.5051069 | -2.2117028 |
| H | 3.9356577  | -1.8847789 | -2.4986418 |
| H | 2.8596348  | -1.9719208 | -1.3777079 |
| O | -0.8413099 | 3.5761127  | -0.9720889 |
| H | -1.2346789 | 4.4392307  | -0.8050229 |
| H | -1.5909019 | 2.9322038  | -1.0034929 |
| O | 2.4277358  | -2.4911948 | 0.2529720  |
| H | 1.4792969  | -2.6054818 | 0.3919990  |
| H | 2.6888818  | -1.7577289 | 0.8484939  |
| O | 3.2807977  | -0.2578600 | 1.6477159  |
| H | 2.7046698  | 0.3970140  | 2.1220408  |
| H | 4.1205657  | -0.2857290 | 2.1196668  |
| O | -3.5386727 | 0.8595979  | 1.3867809  |
| H | -3.1375448 | 1.3663259  | 2.1033278  |
| H | -3.1924698 | -0.0405950 | 1.4921079  |
| O | 1.4623129  | 2.9498658  | 0.3033390  |
| H | 0.6100520  | 3.1661728  | -0.1389380 |
| H | 1.9484069  | 2.3656518  | -0.3053750 |
| O | 1.5884039  | 1.5709699  | 2.5828978  |
| H | 1.4763939  | 2.1504468  | 1.7837629  |
| H | 1.8772169  | 2.1490608  | 3.2977227  |

-----

La:

|   |            |            |            |
|---|------------|------------|------------|
| C | -2.6602288 | -2.1485808 | 0.1494340  |
| C | -1.6591549 | -1.5600879 | -0.6977249 |
| C | -0.5791350 | -0.8452959 | -0.1249910 |
| C | -0.4019800 | -0.6704729 | 1.2394969  |

|   |            |            |            |
|---|------------|------------|------------|
| C | -1.4685509 | -1.2170479 | 2.0803808  |
| C | -2.5274198 | -1.9256629 | 1.5450319  |
| C | -1.4680729 | -1.5471989 | -2.0909398 |
| C | -0.2569700 | -0.8231609 | -2.3568058 |
| N | 0.2333810  | -0.4169150 | -1.1831769 |
| H | -3.4943647 | -2.7091428 | -0.2656880 |
| H | 0.3571020  | -0.0116180 | 1.6514749  |
| H | -1.3925669 | -1.0970869 | 3.1605838  |
| H | -3.2783967 | -2.3379228 | 2.2189328  |
| H | -2.0990858 | -1.9976338 | -2.8497848 |
| H | 0.2259600  | -0.5916970 | -3.2984267 |
| H | 1.1351299  | 0.0727140  | -1.0690519 |
| O | 2.8733938  | 0.5964910  | -1.0175519 |
| H | 3.1697378  | 0.5679590  | -0.0833870 |
| H | 3.1535958  | -0.2722080 | -1.3808189 |
| O | -3.0375708 | 1.4356869  | -1.0112279 |
| H | -3.1589118 | 1.4399849  | -0.0348640 |
| H | -2.8407168 | 0.5134040  | -1.2232529 |
| O | 3.3592057  | -2.0594998 | -1.4627999 |
| H | 2.8126238  | -2.5400008 | -2.0954048 |
| H | 2.9700928  | -2.2383838 | -0.5747590 |
| O | -0.9930659 | 2.9856418  | -1.8369519 |
| H | -1.3570919 | 3.8577057  | -2.0238948 |
| H | -1.7500169 | 2.4349628  | -1.5209489 |
| O | 2.4190568  | -2.1702538 | 1.1032869  |
| H | 1.4586219  | -2.0301078 | 1.1754819  |
| H | 2.7961588  | -1.3309689 | 1.4378189  |
| O | 3.3457487  | 0.3906900  | 1.7040959  |
| H | 2.7009268  | 1.0897359  | 1.9885148  |
| H | 4.1873147  | 0.5957540  | 2.1263328  |
| O | -3.3512457 | 1.2824749  | 1.6999209  |



|   |            |           |            |
|---|------------|-----------|------------|
| H | -2.8836928 | 1.9454829 | 2.2223928  |
| H | -2.9219408 | 0.4341100 | 1.9223599  |
| O | 1.3410569  | 2.9147268 | -0.4794310 |
| H | 0.4825750  | 2.9387808 | -0.9625509 |
| H | 1.8848919  | 2.2391918 | -0.9168219 |
| O | 1.4594579  | 2.2260688 | 2.1014548  |
| H | 1.3478729  | 2.5529818 | 1.1711589  |
| H | 1.6612819  | 3.0012528 | 2.6371908  |

-----

#### W. Water Cluster - Size 12 - CAM-B3LYP/aug-cc-pVXZ Method Group

s0:

|   |            |            |            |
|---|------------|------------|------------|
| C | 1.1996449  | -0.4171640 | 0.7273629  |
| C | 0.2171740  | -1.0341879 | -0.0632250 |
| C | -1.0934589 | -1.1856549 | 0.4573080  |
| C | -1.4496339 | -0.7221579 | 1.7317369  |
| C | -0.4630730 | -0.1059360 | 2.4872218  |
| C | 0.8548539  | 0.0376700  | 1.9935428  |
| C | 0.2060580  | -1.6189849 | -1.3781439 |
| C | -1.0727019 | -2.0821358 | -1.5867679 |
| N | -1.8522039 | -1.8259389 | -0.4883880 |
| H | 2.2172588  | -0.3111630 | 0.3582280  |
| H | -2.4592968 | -0.8521429 | 2.1171428  |
| H | -0.7023059 | 0.2620420  | 3.4831647  |
| H | 1.6101059  | 0.5013090  | 2.6274038  |
| H | 1.0323939  | -1.6704119 | -2.0782858 |
| H | -1.4927149 | -2.5819688 | -2.4527458 |
| H | -2.8665968 | -1.9712938 | -0.4188770 |
| O | -4.8187976 | 0.9346619  | -0.3447360 |

|   |            |            |            |
|---|------------|------------|------------|
| H | -3.9376047 | 1.3510379  | -0.2316200 |
| H | -5.4052986 | 1.3902239  | 0.2696950  |
| O | 1.9008739  | -3.9371007 | 0.0794110  |
| H | 1.6248239  | -3.7303077 | 0.9987099  |
| H | 1.1657409  | -3.6253607 | -0.4670010 |
| O | -4.6354026 | -1.7704769 | -0.0965370 |
| H | -5.2707186 | -2.1896448 | -0.6872179 |
| H | -4.7736346 | -0.7996009 | -0.1924510 |
| O | 1.1885889  | -3.2179338 | 2.6394298  |
| H | 0.4183350  | -3.6414317 | 3.0371238  |
| H | 0.9760109  | -2.2731428 | 2.6141578  |
| O | 3.8598437  | -2.1817028 | -0.7117589 |
| H | 4.4179987  | -1.9686788 | 0.0440340  |
| H | 3.1860908  | -2.8171048 | -0.3782260 |
| O | 3.3331227  | -0.2019890 | -2.6368968 |
| H | 3.4440047  | -0.8278649 | -1.8982269 |
| H | 2.7332758  | 0.5109300  | -2.3380838 |
| O | 3.6819687  | 4.0983917  | 1.4483739  |
| H | 3.5699747  | 4.3343827  | 2.3756308  |
| H | 2.8251198  | 3.7140607  | 1.1764369  |
| O | -0.9934779 | 1.1633069  | -2.4971188 |
| H | -0.8509499 | 0.2080030  | -2.4172308 |
| H | -1.4606069 | 1.4094499  | -1.6727479 |
| O | 1.3211029  | 2.9522578  | 0.5282760  |
| H | 1.0978789  | 2.1262998  | 0.9817019  |
| H | 0.5039760  | 3.4888997  | 0.5447360  |
| O | -2.2377298 | 1.8470709  | -0.0794030 |
| H | -1.8557299 | 1.2769969  | 0.6045920  |
| H | -1.9553329 | 2.7568878  | 0.1464120  |
| O | 1.6478729  | 1.9536919  | -2.1027238 |
| H | 1.6198499  | 2.3348148  | -1.2059189 |

|   |            |           |            |
|---|------------|-----------|------------|
| H | 0.7169139  | 1.7073029 | -2.2852468 |
| O | -1.1201149 | 4.3202167 | 0.4662750  |
| H | -1.3865959 | 4.7973956 | 1.2629949  |
| H | -1.1929279 | 4.9597996 | -0.2545130 |

-----  
La:

|   |            |            |            |
|---|------------|------------|------------|
| C | -1.1725299 | -0.0777580 | -1.4715499 |
| C | -0.5167100 | -0.8134029 | -0.4273530 |
| C | 0.7813229  | -1.3175339 | -0.6226720 |
| C | 1.5341619  | -1.1130049 | -1.7813239 |
| C | 0.8381229  | -0.4073470 | -2.8447568 |
| C | -0.4394600 | 0.0852260  | -2.6916558 |
| C | -0.9105749 | -1.1902309 | 0.8731709  |
| C | 0.1749320  | -1.9299209 | 1.4535869  |
| N | 1.1525189  | -1.9891008 | 0.5559150  |
| H | -2.1833078 | 0.3063530  | -1.3485229 |
| H | 2.4966858  | -1.5901479 | -1.9458639 |
| H | 1.3544189  | -0.2622350 | -3.7928507 |
| H | -0.9035419 | 0.6163850  | -3.5215857 |
| H | -1.8476839 | -0.9713729 | 1.3700619  |
| H | 0.2598520  | -2.3801688 | 2.4354788  |
| H | 2.0941558  | -2.4036068 | 0.7132369  |
| O | 5.0828716  | -0.4821650 | 0.5302630  |
| H | 4.4149477  | 0.1762340  | 0.2400630  |
| H | 5.7865306  | -0.4559750 | -0.1279720 |
| O | -3.8424807 | -2.9337248 | 0.1087810  |
| H | -3.3540397 | -2.9308678 | -0.7456959 |
| H | -3.3060467 | -3.4577097 | 0.7148569  |
| O | 3.7509537  | -2.8215538 | 0.8232259  |
| H | 4.0554137  | -3.2696508 | 1.6202549  |

|   |            |            |            |
|---|------------|------------|------------|
| H | 4.2994937  | -2.0049198 | 0.7376789  |
| O | -2.5722208 | -2.6975698 | -2.2901058 |
| H | -1.9004709 | -3.3441167 | -2.5392458 |
| H | -2.0901318 | -1.8550929 | -2.1757918 |
| O | -4.3653877 | -0.4168420 | 1.0205939  |
| H | -4.5965826 | 0.1267100  | 0.2595730  |
| H | -4.1824327 | -1.3167849 | 0.6654909  |
| O | -2.9310258 | 0.7736859  | 3.1204338  |
| H | -3.4026077 | 0.3991950  | 2.3542688  |
| H | -2.1205728 | 1.1975779  | 2.7689958  |
| O | -2.6086178 | 4.4669087  | -0.9943269 |
| H | -2.6679158 | 4.5745357  | -1.9497739 |
| H | -1.8536069 | 3.8602787  | -0.8510359 |
| O | 1.8966399  | 0.9197229  | 2.4362818  |
| H | 2.0139808  | 0.0239420  | 2.7721348  |
| H | 2.2635008  | 0.9154869  | 1.5258589  |
| O | -0.5224390 | 2.7321828  | -0.4417940 |
| H | -0.6630249 | 1.8553959  | -0.8524449 |
| H | 0.3768090  | 3.0147838  | -0.6973569 |
| O | 2.9180628  | 1.0364409  | -0.1284260 |
| H | 2.4536268  | 0.4390260  | -0.7516349 |
| H | 2.7633658  | 1.9418979  | -0.4640350 |
| O | -0.6278230 | 2.0499228  | 2.2715078  |
| H | -0.6252660 | 2.3365948  | 1.3377109  |
| H | 0.2287920  | 1.5893239  | 2.3844968  |
| O | 2.1132978  | 3.5361157  | -1.0218069 |
| H | 2.3103998  | 3.7748737  | -1.9369179 |
| H | 2.3873728  | 4.2965847  | -0.4925270 |

-----

**X. Water Cluster - Size 15 - CAM-B3LYP/aug-cc-pVXZ Method Group**

s0:

|   |            |            |            |
|---|------------|------------|------------|
| C | 0.4193110  | 0.5736260  | -0.5895560 |
| C | -0.4936920 | -0.0239300 | 0.3015800  |
| C | -1.3287199 | -1.0749129 | -0.1698300 |
| C | -1.2716759 | -1.5404689 | -1.4884819 |
| C | -0.3647830 | -0.9314039 | -2.3479728 |
| C | 0.4727670  | 0.1187120  | -1.9019979 |
| C | -0.8124059 | 0.1589230  | 1.6987479  |
| C | -1.7910209 | -0.7565509 | 2.0086748  |
| N | -2.1222918 | -1.4916959 | 0.8840779  |
| H | 1.0843689  | 1.3623969  | -0.2570930 |
| H | -1.9037069 | -2.3554498 | -1.8203209 |
| H | -0.2861800 | -1.2731399 | -3.3738537 |
| H | 1.1730419  | 0.5693020  | -2.5962768 |
| H | -0.3822910 | 0.8806079  | 2.3763798  |
| H | -2.2834628 | -0.9411229 | 2.9504638  |
| H | -2.6782408 | -2.3631218 | 0.8654819  |
| O | 1.3390109  | -4.2553187 | 0.4807400  |
| H | 1.7838779  | -3.3798537 | 0.2630060  |
| H | 1.8482469  | -4.7819576 | 1.1165659  |
| O | -4.0499247 | 0.9310359  | -0.0178520 |
| H | -3.6543697 | 1.0407659  | -0.9443289 |
| H | -3.7699357 | 0.0912580  | 0.3895400  |
| O | -0.9638199 | -5.0790826 | -0.3282020 |
| H | -0.9262879 | -5.5579616 | -1.1706939 |
| H | -0.0537590 | -4.7542346 | -0.0278120 |
| O | -2.9369538 | 1.3113489  | -2.3359918 |
| H | -2.3479908 | 0.5913190  | -2.6232888 |
| H | -2.4761468 | 2.2069568  | -2.3738698 |

|   |            |            |            |
|---|------------|------------|------------|
| O | -1.2850199 | 3.1737888  | 0.4584230  |
| H | -2.1828388 | 3.3400117  | 0.9026729  |
| H | -1.1687989 | 2.2044658  | 0.3937570  |
| O | 1.3168969  | 3.6026507  | 1.1085749  |
| H | 0.3400700  | 3.5871007  | 0.9449489  |
| H | 1.6012899  | 2.9583198  | 1.8000849  |
| O | 4.5605507  | 1.1026889  | -1.7346509 |
| H | 4.9908186  | 1.5329329  | -2.4886808 |
| H | 4.1556427  | 1.7562949  | -1.0648339 |
| O | 2.1297238  | -0.7973109 | 2.3060248  |
| H | 1.2111969  | -0.9426699 | 2.5962478  |
| H | 2.2836728  | -1.2474829 | 1.4228459  |
| O | 3.5661937  | 2.5962758  | 0.0744820  |
| H | 2.7603208  | 3.1669548  | 0.0370880  |
| H | 3.5361667  | 2.1681308  | 0.9722669  |
| O | 2.3813488  | -1.9193839 | -0.0876990 |
| H | 1.7367409  | -1.4182399 | -0.6254400 |
| H | 3.3243597  | -1.7884959 | -0.4774670 |
| O | 2.8125308  | 1.6856419  | 2.4640858  |
| H | 3.2569168  | 1.9262379  | 3.2937137  |
| H | 2.5611978  | 0.6998869  | 2.4399878  |
| O | 4.6188856  | -1.3558299 | -1.0940269 |
| H | 4.6822846  | -0.3825620 | -1.3913349 |
| H | 5.4335186  | -1.8662859 | -1.2088979 |
| O | -3.1210628 | -3.9664037 | 0.5421300  |
| H | -2.3172458 | -4.4779607 | 0.2007200  |
| H | -3.8721747 | -4.5367827 | 0.7666219  |
| O | -3.6703317 | 3.0810758  | 1.3323469  |
| H | -3.9664607 | 2.2331958  | 0.8600119  |
| H | -4.3807437 | 3.5888537  | 1.7505869  |
| O | -1.7210319 | 3.5700637  | -2.0972618 |

|   |            |           |            |
|---|------------|-----------|------------|
| H | -1.4653679 | 3.6186477 | -1.1308189 |
| H | -1.5863419 | 4.3916607 | -2.5924868 |

-----

La:

|   |            |            |            |
|---|------------|------------|------------|
| C | 0.5040790  | 0.4703970  | -0.8206169 |
| C | -0.4528180 | 0.0971550  | 0.1876260  |
| C | -1.7086649 | -0.4264290 | -0.1884730 |
| C | -2.1290908 | -0.5769390 | -1.5072639 |
| C | -1.1739039 | -0.1533070 | -2.5151958 |
| C | 0.0762590  | 0.3413720  | -2.1851308 |
| C | -0.4172050 | 0.1228840  | 1.6030269  |
| C | -1.6623329 | -0.4185990 | 2.0786768  |
| N | -2.4025848 | -0.7358659 | 1.0067869  |
| H | 1.5316579  | 0.7146029  | -0.5701500 |
| H | -3.0972578 | -0.9779319 | -1.7732469 |
| H | -1.4468799 | -0.2571600 | -3.5605607 |
| H | 0.7644229  | 0.6172470  | -2.9774098 |
| H | 0.3849630  | 0.4744480  | 2.2317448  |
| H | -1.9942918 | -0.5912660 | 3.0891198  |
| H | -3.3084397 | -1.2614969 | 1.0168039  |
| O | -0.5556390 | -4.2414677 | 0.0929370  |
| H | 0.1549920  | -3.5561217 | -0.1063370 |
| H | -0.2099690 | -4.9742486 | 0.6271680  |
| O | -3.3925067 | 2.5154378  | 0.3378120  |
| H | -3.0285418 | 2.6007578  | -0.6080140 |
| H | -3.9577347 | 1.7359609  | 0.4558570  |
| O | -3.0787988 | -4.2337737 | -0.4058900 |
| H | -3.3236817 | -4.6781766 | -1.2321329 |
| H | -2.0790058 | -4.2321457 | -0.2432290 |
| O | -2.3127598 | 2.8427268  | -1.9790058 |

|   |            |            |            |
|---|------------|------------|------------|
| H | -1.8761179 | 2.0416378  | -2.3301858 |
| H | -1.6859739 | 3.6291037  | -1.9676548 |
| O | 0.4497330  | 3.2873907  | 0.2998720  |
| H | -0.2781800 | 3.3029607  | 1.0138159  |
| H | 0.4008570  | 2.4330058  | -0.2027080 |
| O | 2.8646428  | 2.6157918  | 1.2930029  |
| H | 1.9859618  | 2.9759318  | 1.0000469  |
| H | 2.7776648  | 1.8462399  | 1.9058489  |
| O | 4.6672796  | -0.6974539 | -1.9063249 |
| H | 5.3490416  | -0.4506020 | -2.5490458 |
| H | 4.5906916  | -0.0512720 | -1.1204809 |
| O | 1.9485119  | -2.0109128 | 2.1760958  |
| H | 1.3248339  | -2.3741128 | 2.8248328  |
| H | 1.7016239  | -2.2463448 | 1.2294059  |
| O | 4.4158687  | 0.7930439  | 0.1430090  |
| H | 3.9424957  | 1.6622449  | 0.2064680  |
| H | 4.2025317  | 0.3317640  | 0.9946209  |
| O | 1.3228339  | -2.4639678 | -0.3344180 |
| H | 0.9936409  | -1.5831019 | -0.6279320 |
| H | 2.1442288  | -2.7292068 | -0.8886179 |
| O | 3.2828837  | 0.1585280  | 2.5067098  |
| H | 3.7919077  | 0.1897060  | 3.3338487  |
| H | 2.7372728  | -0.6970079 | 2.4350488  |
| O | 3.4066247  | -2.8966468 | -1.6954869 |
| H | 3.9755447  | -2.0639848 | -1.8411179 |
| H | 3.7551997  | -3.6992177 | -2.1102668 |
| O | -4.4374847 | -2.3855298 | 0.7327699  |
| H | -3.9978807 | -3.1799618 | 0.2793210  |
| H | -5.3014936 | -2.5829768 | 1.1244019  |
| O | -1.5308289 | 3.2701908  | 1.9234389  |
| H | -2.3382378 | 2.9383848  | 1.4022969  |



|   |            |           |            |
|---|------------|-----------|------------|
| H | -1.5294669 | 3.0030798 | 2.8554558  |
| O | -0.5702300 | 4.7186946 | -1.6176719 |
| H | -0.0327720 | 4.3545437 | -0.8517049 |
| H | -0.2644730 | 5.5701686 | -1.9635139 |

-----

## Y. MCH

s0:

|   |            |            |            |
|---|------------|------------|------------|
| C | 3.6312937  | -1.8798639 | 0.4555890  |
| C | 2.8224868  | -1.5268729 | -0.6416350 |
| C | 1.5045919  | -2.0751818 | -0.7338189 |
| C | 0.9898449  | -2.9512108 | 0.2308750  |
| C | 1.8140599  | -3.2796447 | 1.3084869  |
| C | 3.1219528  | -2.7490668 | 1.4202269  |
| C | 2.9944018  | -0.6483520 | -1.7742869 |
| C | 1.8227429  | -0.6786959 | -2.4991138 |
| N | 0.9214389  | -1.5434189 | -1.8781859 |
| H | 4.6336376  | -1.4737459 | 0.5523010  |
| H | -0.0150190 | -3.3527387 | 0.1520740  |
| H | 1.4447929  | -3.9520077 | 2.0764238  |
| H | 3.7341557  | -3.0247538 | 2.2731698  |
| H | 3.8713557  | -0.0645640 | -2.0096018 |
| H | 1.5508499  | -0.1585890 | -3.4041267 |
| H | -0.0191880 | -1.7194379 | -2.1905828 |
| C | -2.8295078 | -1.4509919 | 1.2411049  |
| C | -4.3394407 | -1.6696549 | 1.0322789  |
| C | -4.9956256 | -0.4310130 | 0.3926510  |
| C | -4.2943727 | -0.0419730 | -0.9224739 |
| C | -2.7813068 | 0.1865680  | -0.7243819 |

|   |            |            |            |
|---|------------|------------|------------|
| C | -2.1341158 | -1.0529359 | -0.0727400 |
| H | -2.3638238 | -2.3554058 | 1.6546749  |
| H | -2.6788948 | -0.6520010 | 1.9827888  |
| H | -4.8253756 | -1.9064919 | 1.9879788  |
| H | -4.4912937 | -2.5388128 | 0.3733310  |
| H | -6.0625875 | -0.6166790 | 0.2115690  |
| H | -4.9348726 | 0.4128890  | 1.0970299  |
| H | -4.7533966 | 0.8622739  | -1.3457759 |
| H | -4.4362137 | -0.8465379 | -1.6623059 |
| H | -2.6591948 | 1.0305049  | -0.0265590 |
| H | -1.0700959 | -0.8650279 | 0.1068130  |
| H | -2.1990278 | -1.8958199 | -0.7824239 |
| C | -2.0866948 | 0.5534890  | -2.0447218 |
| H | -2.5232208 | 1.4584869  | -2.4846768 |
| H | -1.0161059 | 0.7324299  | -1.8919789 |
| H | -2.1990958 | -0.2594840 | -2.7766348 |
| C | 2.3618268  | 1.7087719  | 1.0858999  |
| C | 1.0988279  | 0.8506089  | 1.2727519  |
| C | -0.0903780 | 1.7108949  | 1.7355789  |
| C | -0.3467760 | 2.8725018  | 0.7578429  |
| C | 0.9096619  | 3.7442117  | 0.5450400  |
| C | 2.1001888  | 2.8651298  | 0.1043090  |
| H | 3.1861678  | 1.0839049  | 0.7235669  |
| H | 2.6713288  | 2.1199098  | 2.0596388  |
| H | 1.2895839  | 0.0347610  | 1.9809268  |
| H | 0.8510989  | 0.3780910  | 0.3133230  |
| H | -0.9923779 | 1.0931459  | 1.8325739  |
| H | 0.1224720  | 2.1192818  | 2.7357238  |
| H | -1.1765019 | 3.4985987  | 1.1157129  |
| H | -0.6554449 | 2.4638148  | -0.2165270 |
| H | 1.1708219  | 4.1985177  | 1.5160999  |

|   |            |           |            |
|---|------------|-----------|------------|
| H | 2.9992848  | 3.4884227 | -0.0036690 |
| H | 1.8812569  | 2.4453318 | -0.8904139 |
| C | 0.6422510  | 4.8743636 | -0.4608920 |
| H | -0.1876660 | 5.5120376 | -0.1310170 |
| H | 1.5285039  | 5.5082506 | -0.5904590 |
| H | 0.3785440  | 4.4588827 | -1.4430859 |

-----

La:

|   |            |            |            |
|---|------------|------------|------------|
| C | -4.1854457 | -0.9363409 | -0.3526120 |
| C | -3.1539368 | -1.1386269 | 0.6222450  |
| C | -1.8907219 | -1.6268009 | 0.2306720  |
| C | -1.5410119 | -1.9466639 | -1.0922609 |
| C | -2.5919158 | -1.7170829 | -2.0701478 |
| C | -3.8469007 | -1.2402209 | -1.7112459 |
| C | -3.1042928 | -0.9261099 | 2.0386688  |
| C | -1.7960229 | -1.3042799 | 2.5041918  |
| N | -1.1014569 | -1.7139619 | 1.4156479  |
| H | -5.1619576 | -0.5568750 | -0.0765790 |
| H | -0.5584000 | -2.2953248 | -1.3796959 |
| H | -2.3781588 | -1.9272769 | -3.1138128 |
| H | -4.5938146 | -1.0862259 | -2.4844938 |
| H | -3.8957237 | -0.5470520 | 2.6679808  |
| H | -1.3760889 | -1.2900139 | 3.4960527  |
| H | -0.1437470 | -2.0371268 | 1.4326369  |
| C | 2.4196038  | -0.6882779 | -1.5904789 |
| C | 3.7861307  | -1.3663129 | -1.7989059 |
| C | 4.7857136  | -0.9483579 | -0.7033769 |
| C | 4.2260397  | -1.2293299 | 0.7040069  |
| C | 2.8607368  | -0.5459020 | 0.9271889  |
| C | 1.8708849  | -0.9626229 | -0.1796910 |

|   |            |            |            |
|---|------------|------------|------------|
| H | 1.6994219  | -1.0297079 | -2.3451228 |
| H | 2.5279638  | 0.3975570  | -1.7277769 |
| H | 4.1848277  | -1.1187429 | -2.7913408 |
| H | 3.6561717  | -2.4592878 | -1.7711509 |
| H | 5.7409536  | -1.4718049 | -0.8406719 |
| H | 4.9961256  | 0.1279240  | -0.7990699 |
| H | 4.9378696  | -0.8942259 | 1.4709729  |
| H | 4.1033267  | -2.3165068 | 0.8369089  |
| H | 3.0140428  | 0.5425080  | 0.8455309  |
| H | 0.9165409  | -0.4397090 | -0.0467100 |
| H | 1.6700559  | -2.0437258 | -0.0806660 |
| C | 2.2980958  | -0.8438319 | 2.3256388  |
| H | 2.9991358  | -0.5364380 | 3.1108598  |
| H | 1.3537779  | -0.3108330 | 2.4937668  |
| H | 2.1198508  | -1.9225409 | 2.4484978  |
| C | -1.8902729 | 1.9807138  | -0.8299459 |
| C | -0.8067899 | 1.7364709  | -1.8950419 |
| C | 0.3199280  | 2.7822278  | -1.7923179 |
| C | 0.9143219  | 2.8368158  | -0.3723410 |
| C | -0.1617500 | 3.0648578  | 0.7112739  |
| C | -1.2786349 | 2.0079148  | 0.5811920  |
| H | -2.6631288 | 1.2070259  | -0.8912649 |
| H | -2.3826468 | 2.9462038  | -1.0278129 |
| H | -1.2517929 | 1.7546209  | -2.8986038 |
| H | -0.3924680 | 0.7279739  | -1.7538179 |
| H | 1.1118539  | 2.5622798  | -2.5214228 |
| H | -0.0836600 | 3.7733167  | -2.0519878 |
| H | 1.6761179  | 3.6269917  | -0.3086310 |
| H | 1.4261289  | 1.8879189  | -0.1574640 |
| H | -0.6147950 | 4.0547637  | 0.5328760  |
| H | -2.0584938 | 2.1949538  | 1.3332449  |

|   |            |           |           |
|---|------------|-----------|-----------|
| H | -0.8551769 | 1.0185169 | 0.8083649 |
| C | 0.4561440  | 3.0608508 | 2.1181738 |
| H | 1.2319589  | 3.8309267 | 2.2152418 |
| H | -0.3054080 | 3.2451058 | 2.8865718 |
| H | 0.9201169  | 2.0880218 | 2.3297218 |

-----

## VI. OPTIMISED GEOMETRIES - EXPLICIT PISALR

Following are the optimised geometries used in the study.

### A. Water

s0:

|   |            |            |            |
|---|------------|------------|------------|
| C | 2.3120798  | 0.5128560  | 0.0006860  |
| C | 0.9614539  | 0.8892729  | 0.0000900  |
| C | -0.0346070 | -0.1270030 | -0.0001020 |
| C | 0.2908330  | -1.4836239 | 0.0003780  |
| C | 1.6342439  | -1.8223139 | 0.0009370  |
| C | 2.6354818  | -0.8333859 | 0.0010810  |
| C | 0.2664120  | 2.1430138  | -0.0006060 |
| C | -1.0736639 | 1.8545629  | -0.0012600 |
| N | -1.2594289 | 0.4931670  | -0.0009620 |
| H | 3.0912988  | 1.2652739  | 0.0008000  |
| H | -0.4802520 | -2.2434008 | 0.0003190  |
| H | 1.9196299  | -2.8664938 | 0.0012510  |
| H | 3.6752127  | -1.1350559 | 0.0014860  |
| H | 0.7031419  | 3.1280188  | -0.0006520 |
| H | -1.9219069 | 2.5190088  | -0.0019260 |
| H | -2.1576138 | 0.0157630  | -0.0012780 |

|   |            |            |            |
|---|------------|------------|------------|
| O | -3.7790777 | -0.9778359 | -0.0079490 |
| H | -3.9098247 | -1.4978409 | 0.7942999  |
| H | -3.8244667 | -1.6150299 | -0.7311999 |

-----

La:

|   |            |            |            |
|---|------------|------------|------------|
| C | 2.3259688  | 0.5924160  | 0.0005380  |
| C | 0.9287889  | 0.8987349  | 0.0000510  |
| C | -0.0225130 | -0.1323980 | 0.0001290  |
| C | 0.2984740  | -1.4920989 | 0.0008410  |
| C | 1.7192439  | -1.7841339 | 0.0009630  |
| C | 2.6728278  | -0.7901379 | 0.0008330  |
| C | 0.2071090  | 2.1193318  | -0.0006670 |
| C | -1.1904169 | 1.8053569  | -0.0012140 |
| N | -1.2922579 | 0.4741020  | -0.0007780 |
| H | 3.0753678  | 1.3707319  | 0.0004210  |
| H | -0.4488380 | -2.2705128 | 0.0015200  |
| H | 2.0332488  | -2.8206288 | 0.0011570  |
| H | 3.7197547  | -1.0691629 | 0.0009320  |
| H | 0.6116510  | 3.1183288  | -0.0008000 |
| H | -2.0496168 | 2.4521368  | -0.0019430 |
| H | -2.1759378 | -0.0480210 | -0.0010620 |
| O | -3.7171377 | -1.0200039 | -0.0082440 |
| H | -3.8539227 | -1.5377079 | 0.7947619  |
| H | -3.7656957 | -1.6562669 | -0.7324289 |

-----

Lb:

|   |            |            |           |
|---|------------|------------|-----------|
| C | 2.3434898  | 0.5298950  | 0.0001200 |
| C | 0.9732669  | 0.9100319  | 0.0000810 |
| C | -0.0568460 | -0.1300300 | 0.0006000 |

|   |            |            |            |
|---|------------|------------|------------|
| C | 0.2392700  | -1.5230969 | 0.0014590  |
| C | 1.6036269  | -1.8524749 | 0.0010550  |
| C | 2.6229258  | -0.8522059 | 0.0003380  |
| C | 0.2898160  | 2.1462988  | -0.0007540 |
| C | -1.0717729 | 1.8860099  | -0.0009220 |
| N | -1.2520529 | 0.4905110  | -0.0001230 |
| H | 3.1339008  | 1.2653169  | -0.0003540 |
| H | -0.5424020 | -2.2674338 | 0.0024550  |
| H | 1.9049789  | -2.8915018 | 0.0013700  |
| H | 3.6541507  | -1.1818959 | 0.0000230  |
| H | 0.7379829  | 3.1263318  | -0.0012130 |
| H | -1.9199559 | 2.5479158  | -0.0014280 |
| H | -2.1542928 | 0.0145090  | -0.0005240 |
| O | -3.7534687 | -0.9576809 | -0.0088730 |
| H | -3.8854537 | -1.4782389 | 0.7929349  |
| H | -3.7994457 | -1.5936899 | -0.7332779 |

-----

## B. MCH

s0:

|   |            |            |            |
|---|------------|------------|------------|
| C | -1.6755199 | 0.8092829  | -1.5902709 |
| C | -1.8076969 | -0.3231730 | -0.7768759 |
| C | -1.9502199 | -0.1459670 | 0.6248500  |
| C | -1.9626839 | 1.1150759  | 1.2168649  |
| C | -1.8315859 | 2.2139298  | 0.3850750  |
| C | -1.6892309 | 2.0624118  | -1.0049019 |
| C | -1.8224419 | -1.7359819 | -1.0204249 |
| C | -1.9697358 | -2.3515398 | 0.1906830  |
| N | -2.0496778 | -1.3991669 | 1.1840809  |

|   |            |            |            |
|---|------------|------------|------------|
| H | -1.5569129 | 0.7031939  | -2.6611888 |
| H | -2.0634128 | 1.2328119  | 2.2883488  |
| H | -1.8291649 | 3.2075138  | 0.8134179  |
| H | -1.5810799 | 2.9440848  | -1.6229609 |
| H | -1.7328139 | -2.2303138 | -1.9730118 |
| H | -2.0210788 | -3.3995137 | 0.4331600  |
| H | -2.1443408 | -1.5935219 | 2.1645978  |
| C | 1.7346109  | -1.4172219 | 1.0620219  |
| C | 2.4233878  | -1.8764419 | -0.2239150 |
| C | 2.0734808  | -0.9584869 | -1.3959729 |
| C | 2.3924428  | 0.5023710  | -1.0752049 |
| C | 1.7008089  | 0.9723749  | 0.2078330  |
| C | 2.0524718  | 0.0455630  | 1.3749909  |
| H | 2.0318188  | -2.0556008 | 1.8989409  |
| H | 0.6534150  | -1.5313349 | 0.9449159  |
| H | 2.1424708  | -2.9074678 | -0.4546830 |
| H | 3.5093587  | -1.8718239 | -0.0734860 |
| H | 2.6084958  | -1.2733409 | -2.2960958 |
| H | 1.0048959  | -1.0510189 | -1.6121849 |
| H | 2.0929118  | 1.1448429  | -1.9083129 |
| H | 3.4773437  | 0.6223080  | -0.9608379 |
| H | 0.6235910  | 0.8982889  | 0.0432620  |
| H | 1.5126919  | 0.3653910  | 2.2714778  |
| H | 3.1216018  | 0.1460120  | 1.6012329  |
| C | 2.0263228  | 2.4273238  | 0.5246140  |
| H | 1.7337629  | 3.0834258  | -0.2982970 |
| H | 1.4991499  | 2.7618648  | 1.4210589  |
| H | 3.0985798  | 2.5612518  | 0.6958819  |

-----  
La:



|   |            |            |            |
|---|------------|------------|------------|
| C | -4.3663127 | -0.2249270 | 0.1632390  |
| C | -3.2236548 | 0.5832450  | -0.1009860 |
| C | -1.9611419 | -0.0003980 | -0.2433000 |
| C | -1.7111339 | -1.3730829 | -0.1384910 |
| C | -2.8838318 | -2.1771618 | 0.1187580  |
| C | -4.1386147 | -1.6275059 | 0.2613360  |
| C | -3.0492678 | 1.9873828  | -0.2627680 |
| C | -1.6635619 | 2.2391908  | -0.5059300 |
| N | -1.0528169 | 1.0494989  | -0.4909510 |
| H | -5.3500276 | 0.2052610  | 0.2764830  |
| H | -0.7311049 | -1.8062899 | -0.2564780 |
| H | -2.7631838 | -3.2497068 | 0.2035290  |
| H | -4.9778686 | -2.2832218 | 0.4563210  |
| H | -3.8100957 | 2.7491398  | -0.2130420 |
| H | -1.1366169 | 3.1601938  | -0.6786369 |
| H | -0.0616970 | 0.9186769  | -0.6287680 |
| C | 2.2176698  | -1.6555899 | 0.1768790  |
| C | 3.6960767  | -1.7877249 | -0.1901980 |
| C | 4.1887237  | -0.5574520 | -0.9535389 |
| C | 3.9092947  | 0.7314159  | -0.1795670 |
| C | 2.4285228  | 0.8755299  | 0.1894660  |
| C | 1.9497219  | -0.3652590 | 0.9512769  |
| H | 1.8892359  | -2.5177478 | 0.7616309  |
| H | 1.6200199  | -1.6581979 | -0.7421769 |
| H | 3.8602837  | -2.6913678 | -0.7819649 |
| H | 4.2844197  | -1.9013979 | 0.7271729  |
| H | 5.2573946  | -0.6437340 | -1.1641839 |
| H | 3.6822817  | -0.5106730 | -1.9243339 |
| H | 4.2327617  | 1.6006709  | -0.7587399 |
| H | 4.4975717  | 0.7354219  | 0.7456299  |
| H | 1.8797549  | 0.9256659  | -0.7653279 |

|   |           |            |           |
|---|-----------|------------|-----------|
| H | 0.8867139 | -0.2834960 | 1.1948989 |
| H | 2.4769168 | -0.4025850 | 1.9115569 |
| C | 2.1631978 | 2.1592798  | 0.9703379 |
| H | 2.4736648 | 3.0401908  | 0.4041860 |
| H | 1.1050829 | 2.2705508  | 1.2193139 |
| H | 2.7200888 | 2.1544878  | 1.9105019 |

-----

Lb:

|   |            |            |            |
|---|------------|------------|------------|
| C | 2.2806628  | 0.4753900  | 1.4143989  |
| C | 2.0954998  | -0.4490340 | 0.3600910  |
| C | 1.7567609  | 0.0462310  | -0.9712259 |
| C | 1.6127559  | 1.4193839  | -1.2762809 |
| C | 1.7980969  | 2.3061098  | -0.2029450 |
| C | 2.1236868  | 1.8460849  | 1.1087509  |
| C | 2.1293168  | -1.8571589 | 0.2680420  |
| C | 1.8212429  | -2.2158388 | -1.0356519 |
| N | 1.6001279  | -1.0487199 | -1.7695089 |
| H | 2.5289168  | 0.1469950  | 2.4122788  |
| H | 1.3651319  | 1.7598959  | -2.2697888 |
| H | 1.6868909  | 3.3692607  | -0.3651840 |
| H | 2.2513928  | 2.5823028  | 1.8907619  |
| H | 2.3395078  | -2.5475258 | 1.0676269  |
| H | 1.7434739  | -3.1832208 | -1.4993189 |
| H | 1.3507529  | -1.0220359 | -2.7426208 |
| C | -1.9580579 | 1.6167839  | -0.1865100 |
| C | -3.1974818 | 1.0296999  | -0.8626759 |
| C | -3.0145928 | -0.4607890 | -1.1537379 |
| C | -2.6465548 | -1.2331399 | 0.1134710  |
| C | -1.3972159 | -0.6597299 | 0.7903329  |
| C | -1.5769919 | 0.8348089  | 1.0705269  |

|   |            |            |            |
|---|------------|------------|------------|
| H | -2.1219788 | 2.6690028  | 0.0607580  |
| H | -1.1149399 | 1.5881989  | -0.8840069 |
| H | -3.4195537 | 1.5719619  | -1.7858399 |
| H | -4.0652547 | 1.1608269  | -0.2058160 |
| H | -3.9216537 | -0.8755919 | -1.6015039 |
| H | -2.2141608 | -0.5857230 | -1.8925159 |
| H | -2.4879818 | -2.2904008 | -0.1190210 |
| H | -3.4850027 | -1.1906369 | 0.8198029  |
| H | -0.5683260 | -0.7672669 | 0.0823450  |
| H | -0.6547240 | 1.2384809  | 1.4958019  |
| H | -2.3592908 | 0.9593169  | 1.8301319  |
| C | -1.0326819 | -1.4276999 | 2.0553688  |
| H | -0.8571059 | -2.4841088 | 1.8394419  |
| H | -0.1262060 | -1.0208169 | 2.5078358  |
| H | -1.8374589 | -1.3644909 | 2.7936648  |

-----
